# Supplementary material for: Systems biology meets stress ecology: linking molecular and organismal stress responses in Daphnia magna
Source: PubMed Central journal article supplement (PMC2374704; doi:10.1186/gb-2008-9-2-r40), 2008-02-21
Supplement: gb-2008-9-2-r40-S1.pdf [file gb-2008-9-2-r40-S1.pdf]

**Additional data file 1. Annotation of microarray *Daphnia magna* genes responding to acute ibuprofen exposure.**

| Clone ID <sup>a</sup> | Putative gene                                | Gene symbol | Species Match <sup>b</sup>            | Accession#   | E-value   | Contig <sup>c</sup> |
|-----------------------|----------------------------------------------|-------------|---------------------------------------|--------------|-----------|---------------------|
| IGU001_0032_G10       | 16S ribosomal RNA                            | 16S rRNA    | <i>Daphnia magna</i>                  | AY921452     | 0.00E+00  | 1130                |
| IGU001_0035_F02       | 16S ribosomal RNA                            | 16S rRNA    | <i>Daphnia magna</i>                  | AY921452     | 0.00E+00  | 1130                |
| IGU001_0049_B12       | 16S ribosomal RNA                            | 16S rRNA    | <i>Daphnia magna</i>                  | AY921452     | 0.00E+00  | 1130                |
| IGU001_0053_A01       | 16S ribosomal RNA                            | 16S rRNA    | <i>Daphnia magna</i>                  | AY921452     | 0.00E+00  | 1130                |
| R07CDR3E07            | 16S ribosomal RNA                            | 16S rRNA    | <i>Daphnia magna</i>                  | AY921452     | 0.00E+00  | 1130                |
| WTH001_0003_C20       | 16S ribosomal RNA                            | 16S rRNA    | <i>Daphnia magna</i>                  | AY921452     | 0.00E+00  | 1130                |
| WTH001_0003_L15       | 16S ribosomal RNA                            | 16S rRNA    | <i>Daphnia magna</i>                  | AY921452     | 0.00E+00  | 1130                |
| WTH001_0012_A16       | 16S ribosomal RNA                            | 16S rRNA    | <i>Daphnia magna</i>                  | AY921452     | 0.00E+00  | 1130                |
| WTH001_0002_J23       | 28S ribosomal RNA                            | 28S rRNA    | <i>Daphnia magna</i>                  | AF346515     | 0.00E+00  | 128                 |
| WTH001_0009_H09       | 28S ribosomal RNA                            | 28S rRNA    | <i>Daphnia magna</i>                  | AF346515     | 0.00E+00  | 128                 |
| WTH001_0014_N15       | 28S ribosomal RNA                            | 28S rRNA    | <i>Daphnia magna</i>                  | AF346515     | 2.00E-70  | 128                 |
| IGU001_0051_A10       | 5'-nucleotidase-related                      | Nt5         | <i>Anopheles gambiae</i>              | XP_308620    | 1.00E-24  |                     |
| R14PHR1A09            | Actin                                        | Act         | <i>Daphnia magna</i>                  | CAB99474     | 1.00E-70  |                     |
| WTH001_0007_L13       | Actin                                        | Act         | <i>Apis mellifera</i>                 | XP_001121105 | 7.00E-23  | 3                   |
| WTH001_0009_A05       | Acyl CoA synthetase                          | ACS         | <i>Apis mellifera</i>                 | XP_395996    | 8.00E-34  | 671                 |
| IGU001_0034_C11       | ADP/ATP translocase                          | ANT         | <i>Aedes aegypti</i>                  | ABF18037     | 3.00E-139 | 49                  |
| WTH001_0009_O02       | Alpha amylase                                | amyA        | <i>Corbicula fluminea</i>             | AAO17927     | 3.00E-36  |                     |
| WTH001_0005_C13       | Astacin (zinc metalloprotease)               | ASTFL       | <i>Drosophila melanogaster</i>        | AAM29490     | 2.00E-33  | 809                 |
| IGU001_0002_E04       | ATP synthase a chain                         | atpB        | <i>Daphnia pulex</i>                  | NP_008625    | 4.00E-07  |                     |
| IGU001_0048_A07       | ATP synthase a chain                         | atpB        | <i>Daphnia melanica</i>               | ABD19465     | 9.00E-28  |                     |
| WTH001_0011_G12       | ATP synthase a chain                         | atpB        | <i>Daphnia melanica</i>               | ABD19465     | 1.00E-22  |                     |
| WTH001_0009_J10       | Bovine pancreatic trypsin inhibitor domain   | BPT1        | <b>Danio rerio</b>                    | AAI15336     | 2.00E-18  |                     |
| IGU001_0028_A09       | Calcification-associated peptide-2 precursor | cap-2       | <i>Tribolium castaneum</i>            | XP_973761    | 8.00E-08  | 106                 |
| WTH001_0012_E06       | Calcification-associated peptide-2 precursor | cap-2       | <i>Tribolium castaneum</i>            | XP_973761    | 8.00E-08  | 106                 |
| WTH001_0002_H09       | Carboxypeptidase A2                          | CPA2        | <i>Strongylocentrotus purpuratus</i>  | XP_786036    | 3.00E-21  | 800                 |
| WTH001_0007_J09       | Cathepsin L-like protease precursor          | CATL1       | <i>Artemia franciscana</i>            | AAV63977     | 3.00E-47  | 389                 |
| WTH001_0011_J11       | Cathepsin L-like protease precursor          | CATL1       | <i>Artemia franciscana</i>            | AAD39513     | 7.00E-24  | 389                 |
| WTH001_0003_J14       | Chitinase                                    | Cht         | <i>Tribolium castaneum</i>            | ABG47448     | 7.00E-73  | 961                 |
| WTH001_0006_H05       | Chitinase                                    | Cht         | <i>Apis mellifera</i>                 | XP_395734    | 3.00E-22  | 961                 |
| WTH001_0007_H23       | Chitinase                                    | Cht         | <i>Apis mellifera</i>                 | XP_395734    | 2.00E-33  | 961                 |
| WTH001_0007_N19       | Chitinase                                    | Cht         | <i>Litopenaeus vannamei</i>           | CAA75309     | 1.00E-41  | 961                 |
| WTH001_0009_A13       | Chitinase                                    | Cht         | <i>Dermatophagoides pteronyssinus</i> | AAV84564     | 7.00E-34  | 961                 |
| WTH001_0009_G16       | Chitinase                                    | Cht         | <i>Anopheles gambiae</i>              | EAT45796     | 3.00E-32  | 961                 |
| WTH001_0009_M05       | Chitinase                                    | Cht         | <i>Drosophila melanogaster</i>        | AAM50881     | 3.00E-26  | 961                 |
| WTH001_0009_N10       | Chitinase                                    | Cht         | <i>Apis mellifera</i>                 | XP_395734    | 2.00E-38  | 961                 |
| WTH001_0010_O15       | Chitinase                                    | Cht         | <i>Ixodes ricinus</i>                 | AAQ93649     | 2.00E-18  | 961                 |
| IGU001_0028_B02       | Chitinase                                    | Cht         | <i>Tenebrio molitor</i>               | AAP92418     | 2.00E-36  | 132                 |

|                 |                                                         |                      |                               |              |          |      |
|-----------------|---------------------------------------------------------|----------------------|-------------------------------|--------------|----------|------|
| WTH001_0003_F07 | <i>Chitin-binding domain type 2</i>                     | <i>ChtBD2</i>        | <i>Aedes aegypti</i>          | EAT45952     | 2.00E-88 | 109  |
| WTH001_0002_G19 | <i>Chitin-binding Peritrophin-A domain</i>              | <i>Peritrophin-A</i> | <i>Apis mellifera</i>         | XP_001120217 | 8.00E-35 | 957  |
| IGU001_0017_B10 | <i>Chymotrypsin B2</i>                                  | <i>Ctrb2</i>         | <i>Litopenaeus vannamei</i>   | CAA71673     | 1.00E-36 | 384  |
| IGU001_0044_G03 | <i>Chymotrypsin B2</i>                                  | <i>Ctrb2</i>         | <i>Litopenaeus vannamei</i>   | CAA71673     | 9.00E-33 | 384  |
| WTH001_0005_A17 | <i>Contactin 1</i>                                      | <i>Cntn1</i>         | <b><i>Macaca mulatta</i></b>  | XP_001088804 | 7.00E-06 |      |
| IGU001_0028_H04 | <i>C-terminal binding protein</i>                       | <i>CTBP</i>          | <i>Tribolium castaneum</i>    | XP_972241    | 1.00E-74 |      |
| IGU001_0026_E10 | <i>C-type lectin-like</i>                               | <i>CLECT</i>         | <i>Incilaria fruhstorferi</i> | BAA19861     | 1.00E-05 | 960  |
| IGU001_0017_H07 | <i>CUB domain</i>                                       | <i>CUB</i>           | <i>Tribolium castaneum</i>    | XP_973589    | 3.00E-20 | 1344 |
| WTH001_0002_N09 | <i>Cuticle protein 7</i>                                | <i>CP7</i>           | <i>Blaberus craniifer</i>     | P82120       | 1.00E-18 | 771  |
| WTH001_0014_K24 | <i>Cuticle protein 7</i>                                | <i>CP7</i>           | <i>Blaberus craniifer</i>     | P82120       | 1.00E-18 | 771  |
| WTH001_0009_O15 | <i>Cuticle structural protein post-ecdysial PCP16.7</i> | <i>PCP16.7</i>       | <i>Tenebrio molitor</i>       | S78003       | 2.00E-15 | 1    |
| IGU001_0030_H07 | <i>Cuticular protein precursor</i>                      | <i>LPCP29</i>        | <i>Anopheles gambiae</i>      | EAA14439     | 2.00E-11 | 561  |
| WTH001_0002_A20 | <i>Cuticular protein precursor</i>                      | <i>LPCP29</i>        | <i>Tenebrio molitor</i>       | CAA03880     | 4.00E-10 | 561  |
| WTH001_0013_K04 | <i>Cysteine-rich intestinal protein</i>                 | <i>CRIP</i>          | <i>Apis mellifera</i>         | XP_001122454 | 1.00E-32 | 652  |
| IGU001_0002_C09 | <i>Cytochrome b</i>                                     | <i>CYTB</i>          | <i>Daphnia pulex</i>          | ABD19355     | 2.00E-60 |      |
| IGU001_0029_H01 | <i>Cytochrome b</i>                                     | <i>CYTB</i>          | <i>Daphnia pulex</i>          | NP_008632    | 6.00E-58 | 182  |
| IGU001_0031_D07 | <i>Cytochrome b</i>                                     | <i>CYTB</i>          | <i>Daphnia pulex</i>          | NP_008632    | 9.00E-72 | 182  |
| IGU001_0007_G01 | <i>Cytochrome c oxidase subunit 1</i>                   | <i>CO1</i>           | <i>Daphnia pulex</i>          | NP_008622    | 1.00E-40 | 135  |
| IGU001_0007_G12 | <i>Cytochrome c oxidase subunit 1</i>                   | <i>CO1</i>           | <i>Daphnia pulex</i>          | ABD19215     | 1.00E-60 | 135  |
| IGU001_0015_H03 | <i>Cytochrome c oxidase subunit 1</i>                   | <i>CO1</i>           | <i>Daphnia pulex</i>          | NP_008622    | 4.00E-61 | 135  |
| IGU001_0034_H02 | <i>Cytochrome c oxidase subunit 1</i>                   | <i>CO1</i>           | <i>Daphnia pulex</i>          | ABD19215     | 2.00E-55 | 135  |
| IGU001_0050_H02 | <i>Cytochrome c oxidase subunit 1</i>                   | <i>CO1</i>           | <i>Daphnia pulex</i>          | AAB53197     | 2.00E-40 | 135  |
| WTH001_0003_L17 | <i>Cytochrome c oxidase subunit 1</i>                   | <i>CO1</i>           | <i>Daphnia pulex</i>          | NP_008622    | 3.00E-37 | 135  |
| IGU001_0012_A03 | <i>Cytochrome c oxidase subunit 2</i>                   | <i>CO2</i>           | <i>Daphnia pulex</i>          | ABD19294     | 1.00E-51 | 1020 |
| IGU001_0014_B12 | <i>Cytochrome c oxidase subunit 2</i>                   | <i>CO2</i>           | <i>Daphnia pulex</i>          | ABD19294     | 4.00E-51 |      |
| IGU001_0027_E12 | <i>Cytochrome c oxidase subunit 2</i>                   | <i>CO2</i>           | <i>Daphnia pulex</i>          | ABD19294     | 6.00E-61 | 1020 |
| WTH001_0007_G08 | <i>Cytochrome c oxidase subunit 2</i>                   | <i>CO2</i>           | <i>Daphnia pulex</i>          | NP_008623    | 1.00E-21 | 1020 |
| WTH001_0010_G24 | <i>DD5 (structural constituent of cuticle)</i>          | <i>DD5</i>           | <i>Marsupenaeus japonicus</i> | AB049147     | 1.00E-06 | 327  |
| WTH001_0001_K09 | <i>DEAD Box ATP-dependent RNA helicase</i>              | <i>DEADc</i>         | <i>Apis mellifera</i>         | XP_394723    | 2.00E-45 | 968  |
| WTH001_0002_F01 | <i>Endo-beta-1,4-mannanase</i>                          | <i>MANA</i>          | <i>Mytilus edulis</i>         | AJ271365     | 3.00E-22 |      |
| IGU001_0032_A08 | <i>Enolase</i>                                          | <i>Eno</i>           | <i>Daphnia magna</i>          | AAS02302     | 0.00E+00 | 511  |
| WTH001_0001_D10 | <i>Enolase</i>                                          | <i>Eno</i>           | <i>Daphnia magna</i>          | AY522935     | 0.00E+00 | 511  |
| WTH001_0001_N23 | <i>Enolase</i>                                          | <i>Eno</i>           | <i>Daphnia magna</i>          | AAS02302     | 0.00E+00 | 511  |
| R14PHF2B06      | <i>Fatty acid binding protein 3</i>                     | <i>FABP3</i>         | <i>Schistocerca gregaria</i>  | AAK20174     | 9.00E-11 |      |
| IGU001_0025_E01 | <i>Ferritin</i>                                         | <i>Fer</i>           | <i>Daphnia pulex</i>          | CAB72315     | 9.00E-51 | 329  |
| R09CAF1A02      | <i>Ferritin</i>                                         | <i>Fer</i>           | <i>Daphnia pulex</i>          | CAB72315     | 4.00E-64 |      |
| R09CAF1E02      | <i>Ferritin</i>                                         | <i>Fer</i>           | <i>Daphnia pulex</i>          | CAB72315     | 2.00E-63 |      |
| RBH01           | <i>Ferritin</i>                                         | <i>Fer</i>           | <i>Daphnia pulex</i>          | CAB72315     | 8.00E-49 |      |
| WTH001_0001_K10 | <i>Ferritin</i>                                         | <i>Fer</i>           | <i>Daphnia pulex</i>          | AJ245734     | 2.00E-17 | 329  |
| WTH001_0001_N01 | <i>Ferritin</i>                                         | <i>Fer</i>           | <i>Daphnia pulex</i>          | AJ245734     | 7.00E-45 | 329  |

|                 |                                                    |                |                                |           |           |     |
|-----------------|----------------------------------------------------|----------------|--------------------------------|-----------|-----------|-----|
| WTH001_0002_E17 | <i>Ferritin</i>                                    | <i>Fer</i>     | <i>Daphnia pulex</i>           | ABK91576  | 2.00E-44  | 329 |
| WTH001_0002_E23 | <i>Ferritin</i>                                    | <i>Fer</i>     | <i>Daphnia pulex</i>           | ABK91576  | 2.00E-72  | 329 |
| WTH001_0002_O01 | <i>Ferritin</i>                                    | <i>Fer</i>     | <i>Daphnia pulex</i>           | ABK91576  | 2.00E-72  | 329 |
| WTH001_0003_M01 | <i>Ferritin</i>                                    | <i>Fer</i>     | <i>Daphnia pulex</i>           | ABK91576  | 2.00E-72  | 329 |
| WTH001_0004_K17 | <i>Ferritin</i>                                    | <i>Fer</i>     | <i>Daphnia pulex</i>           | ABK91576  | 2.00E-72  | 329 |
| WTH001_0004_M03 | <i>Ferritin</i>                                    | <i>Fer</i>     | <i>Daphnia pulex</i>           | CAB72315  | 1.00E-49  |     |
| WTH001_0005_O20 | <i>Ferritin</i>                                    | <i>Fer</i>     | <i>Daphnia pulex</i>           | ABK91576  | 2.00E-72  | 329 |
| WTH001_0009_A17 | <i>Ferritin</i>                                    | <i>Fer</i>     | <i>Daphnia pulex</i>           | ABK91576  | 2.00E-72  | 329 |
| WTH001_0009_K02 | <i>Ferritin</i>                                    | <i>Fer</i>     | <i>Daphnia pulex</i>           | ABK91576  | 2.00E-72  | 329 |
| WTH001_0010_B18 | <i>Ferritin</i>                                    | <i>Fer</i>     | <i>Daphnia pulex</i>           | ABK91576  | 7.00E-10  | 329 |
| WTH001_0010_E20 | <i>Ferritin</i>                                    | <i>Fer</i>     | <i>Daphnia pulex</i>           | ABK91576  | 5.00E-59  | 329 |
| WTH001_0010_G18 | <i>Ferritin</i>                                    | <i>Fer</i>     | <i>Daphnia pulex</i>           | ABK91576  | 2.00E-72  | 329 |
| WTH001_0010_L19 | <i>Ferritin</i>                                    | <i>Fer</i>     | <i>Daphnia pulex</i>           | ABK91576  | 2.00E-72  | 329 |
| WTH001_0010_N23 | <i>Ferritin</i>                                    | <i>Fer</i>     | <i>Daphnia pulex</i>           | ABK91576  | 2.00E-72  | 329 |
| WTH001_0012_N12 | <i>Ferritin</i>                                    | <i>Fer</i>     | <i>Daphnia pulex</i>           | ABK91576  | 2.00E-56  | 329 |
| WTH001_0014_G13 | <i>Ferritin</i>                                    | <i>Fer</i>     | <i>Daphnia pulex</i>           | ABK91576  | 3.00E-15  | 329 |
| WTH001_0002_C15 | <i>Ferritin 1-like protein A</i>                   | <i>Fer1HCH</i> | <i>Daphnia pulex</i>           | ABK91577  | 1.00E-81  | 114 |
| WTH001_0002_L18 | <i>Gasp precursor</i>                              | <i>Gasp</i>    | <i>Drosophila melanogaster</i> | AAD09748  | 9.00E-21  | 910 |
| WTH001_0005_P05 | <i>Glutathione peroxidase</i>                      | <i>GPX</i>     | <i>Ixodes scapularis</i>       | AAZ66814  | 2.00E-37  | 875 |
| IGU001_0046_C04 | <i>Glycogen phosphorylase</i>                      | <i>GlyP</i>    | <i>Drosophila melanogaster</i> | NP_722762 | 5.00E-76  |     |
| IGU001_0032_H11 | <i>GM2 ganglioside activator protein</i>           | <i>GM2A</i>    | <b><i>Xenopus laevis</i></b>   | AAH74424  | 7.00E-07  | 587 |
| WTH001_0010_I05 | <i>GM2 ganglioside activator protein</i>           | <i>GM2A</i>    | <b><i>Danio rerio</i></b>      | AAH92784  | 2.00E-07  | 587 |
| WTH001_0012_G09 | <i>GM2 ganglioside activator protein</i>           | <i>GM2A</i>    | <b><i>Danio rerio</i></b>      | AAH92784  | 2.00E-07  | 587 |
| WTH001_0005_E02 | <i>Gram-negative bacteria binding protein</i>      | <i>GNBP</i>    | <i>Nasutitermes comatus</i>    | AAZ08486  | 1.00E-17  | 74  |
| WTH001_0007_G12 | <i>Haemoglobin 1</i>                               | <i>dmHb1</i>   | <i>Daphnia magna</i>           | U67067    | 0.00E+00  | 391 |
| IGU001_0009_B08 | <i>Haemoglobin 2</i>                               | <i>dmHb2</i>   | <i>Daphnia magna</i>           | AB021136  | 2.00E-159 | 119 |
| WTH001_0010_F04 | <i>Haemoglobin 2</i>                               | <i>dmHb2</i>   | <i>Daphnia magna</i>           | AB021136  | 2.00E-122 | 119 |
| WTH001_0012_E08 | <i>Haemoglobin 2</i>                               | <i>dmHb2</i>   | <i>Daphnia magna</i>           | AB021136  | 2.00E-70  | 119 |
| WTH001_0014_O13 | <i>Haemoglobin 2</i>                               | <i>dmHb2</i>   | <i>Daphnia magna</i>           | AB021136  | 9.00E-79  | 119 |
| WTH001_0004_I13 | <i>Heat Shock Protein 20</i>                       | <i>HSP20</i>   | <i>Locusta migratoria</i>      | ABC84493  | 1.00E-40  | 414 |
| R04CDF4A09      | <i>Heat Shock Protein 70</i>                       | <i>HSP70</i>   | <b><i>Bos taurus</i></b>       | 1NGH      | 2.00E-09  |     |
| WTH001_0007_N09 | <i>Histone H4</i>                                  | <i>H4</i>      | <b><i>Mus musculus</i></b>     | AAI15447  | 5.00E-21  |     |
| WTH001_0006_D22 | <i>Innexin 2</i>                                   | <i>Inx2</i>    | <i>Bombyx mori</i>             | AAR97567  | 3.00E-146 | 357 |
| IGU001_0025_B06 | <i>Insect cuticle protein (Chitin_bind_4)</i>      | <i>ChtBD4</i>  | <i>Tribolium castaneum</i>     | XP_969336 | 2.00E-08  | 24  |
| WTH001_0010_L07 | <i>Insect pheromone-binding protein A10</i>        | <i>A10</i>     | <i>Apis mellifera</i>          | CAJ01445  | 4.00E-14  | 131 |
| WTH001_0005_H06 | <i>Juvenile hormone esterase</i>                   | <i>JHE</i>     | <i>Harmonia axyridis</i>       | BAE16975  | 4.00E-11  |     |
| WTH001_0007_O20 | <i>Lipoprotein N-terminal Domain (VTG related)</i> | <i>LPD_N</i>   | <i>Aedes aegypti</i>           | AB037697  | 1.00E-24  | 850 |
| WTH001_0009_D09 | <i>Lipoprotein N-terminal Domain (VTG related)</i> | <i>LPD_N</i>   | <i>Aedes aegypti</i>           | AB037697  | 1.00E-24  | 850 |
| WTH001_0009_L11 | <i>Lipoprotein N-terminal Domain (VTG related)</i> | <i>LPD_N</i>   | <i>Aedes aegypti</i>           | AB037697  | 1.00E-24  | 850 |
| WTH001_0010_C02 | <i>Lipoprotein N-terminal Domain (VTG related)</i> | <i>LPD_N</i>   | <i>Aedes aegypti</i>           | AB037697  | 1.00E-24  | 850 |

|                 |                                                          |               |                                   |              |           |      |
|-----------------|----------------------------------------------------------|---------------|-----------------------------------|--------------|-----------|------|
| WTH001_0010_G23 | <i>Lipoprotein N-terminal Domain (VTG related)</i>       | <i>LPD_N</i>  | <i>Aedes aegypti</i>              | AB037697     | 1.00E-24  | 850  |
| IGU001_0051_C02 | <i>Myosin regulatory light chain 2</i>                   | <i>MRLC2</i>  | <i>Grylotalpa orientalis</i>      | AAW22542     | 2.00E-40  | 1099 |
| WTH001_0001_M24 | <i>Na<sup>+</sup>/K<sup>+</sup> ATPase alpha subunit</i> | <i>AT1A</i>   | <i>Artemia franciscana</i>        | CAA39972     | 4.00E-63  | 871  |
| WTH001_0011_E12 | <i>NADH dehydrogenase subunit 4</i>                      | <i>ND4</i>    | <i>Daphnia pulex</i>              | ABD19378     | 8.00E-22  | 425  |
| IGU001_0001_H03 | <i>Pleiotrophin</i>                                      | <i>PTN</i>    | <i>Apis mellifera</i>             | XP_623430    | 2.00E-12  | 21   |
| WTH001_0014_E10 | <i>Polyubiquitin</i>                                     | <i>UBQ</i>    | <b><i>Bos taurus</i></b>          | BAC56573     | 9.00E-53  |      |
| R14PHR1E10      | <i>Protein disulfide isomerase</i>                       | <i>PDI</i>    | <i>Tribolium castaneum</i>        | XP_975184    | 1.00E-78  |      |
| WTH001_0004_H19 | <i>RAS-like GTP-binding protein</i>                      | <i>RhoA</i>   | <i>Aedes aegypti</i>              | EAT34635     | 5.00E-60  | 546  |
| IGU001_0014_F05 | <i>Receptor expression-enhancing protein 5</i>           | <i>REEP5</i>  | <b><i>Danio rerio</i></b>         | AAH59545     | 3.00E-41  |      |
| AD2C06          | <i>Reelin</i>                                            | <i>Reln</i>   | <i>Lonomia obliqua</i>            | AAV91350     | 8.00E-08  | 339  |
| WTH001_0010_M21 | <i>Ribosomal protein L14</i>                             | <i>RpL14</i>  | <i>Apis mellifera</i>             | XP_392809    | 5.00E-33  | 858  |
| IGU001_0017_C06 | <i>Ribosomal protein L15</i>                             | <i>RpL15</i>  | <i>Ixodes ricinus</i>             | AAV66921     | 2.00E-50  | 667  |
| R01CDF1C01      | <i>Ribosomal protein L22</i>                             | <i>RpL22</i>  | <i>Tribolium castaneum</i>        | XP_970247    | 9.00E-34  |      |
| IGU001_0031_B09 | <i>Ribosomal protein L27</i>                             | <i>RpL27</i>  | <i>Spodoptera frugiperda</i>      | AAK92163     | 1.00E-35  | 260  |
| WTH001_0003_A23 | <i>Ribosomal protein L28</i>                             | <i>RpL28</i>  | <i>Sphaerius sp.</i>              | CAJ17404     | 1.00E-10  | 446  |
| WTH001_0010_B19 | <i>Ribosomal protein L30</i>                             | <i>RpL30</i>  | <i>Argopecten irradians</i>       | AF526198     | 4.00E-54  | 1260 |
| WTH001_0014_L20 | <i>Ribosomal protein L38</i>                             | <i>RpL38</i>  | <i>Plutella xylostella</i>        | BAD26684     | 4.00E-29  | 111  |
| IGU001_0015_C06 | <i>Ribosomal protein L6</i>                              | <i>RpL6</i>   | <i>Carabus granulatus</i>         | CAJ17232     | 5.00E-14  | 1031 |
| IGU001_0030_G11 | <i>Ribosomal protein L9</i>                              | <i>RpL9</i>   | <i>Artemia franciscana</i>        | ABC02755     | 7.00E-07  | 490  |
| WTH001_0002_J09 | <i>Ribosomal protein S10</i>                             | <i>RpS10</i>  | <i>Ixodes scapularis</i>          | AAV66831     | 3.00E-40  | 861  |
| IGU001_0037_H02 | <i>Ribosomal protein S12</i>                             | <i>RpS12</i>  | <i>Periplaneta americana</i>      | AAM33784     | 1.00E-24  | 704  |
| R15LFF1H05      | <i>Ribosomal protein S13</i>                             | <i>RpS13</i>  | <b><i>Mus musculus</i></b>        | XP_001004217 | 4.00E-25  |      |
| IGU001_0006_D10 | <i>Ribosomal protein S17</i>                             | <i>RpS17</i>  | <i>Diaphorina citri</i>           | ABG81965     | 3.00E-41  | 88   |
| IGU001_0036_D07 | <i>Ribosomal protein S2</i>                              | <i>RpS2</i>   | <i>Urechis caupo</i>              | P49154       | 1.00E-59  | 1007 |
| IGU001_0038_H10 | <i>Ribosomal protein S20</i>                             | <i>RpS20</i>  | <b><i>Oncorhynchus mykiss</i></b> | CAC44156     | 1.00E-50  | 84   |
| IGU001_0056_E06 | <i>Ribosomal protein S25</i>                             | <i>RpS25</i>  | <i>Platystomos albinus</i>        | CAH04344     | 6.00E-30  | 496  |
| WTH001_0003_M18 | <i>Ribosomal protein S3A</i>                             | <i>RpS3A</i>  | <i>Tribolium castaneum</i>        | XP_968064    | 8.00E-107 | 212  |
| WTH001_0009_J03 | <i>Ribosomal protein S3A</i>                             | <i>RpS3A</i>  | <i>Culicoides sonorensis</i>      | AAU06483     | 6.00E-85  | 212  |
| IGU001_0031_E09 | <i>Ribosomal protein S4</i>                              | <i>RpS4</i>   | <i>Sphaerius sp.</i>              | CAJ17169     | 7.00E-55  | 979  |
| WTH001_0001_L14 | <i>Rieske iron-sulfur protein</i>                        | <i>RISP</i>   | <i>Lagothrix lagotricha</i>       | Q69BJ8       | 7.00E-14  | 503  |
| IGU001_0009_C10 | <i>Selenoprotein 15</i>                                  | <i>Sep15</i>  | <i>Anopheles gambiae</i>          | AAL68777     | 1.00E-35  |      |
| WTH001_0007_K22 | <i>Serine collagenase 1 precursor</i>                    | <i>SC1</i>    | <i>Celuca pugilator</i>           | AAC47030     | 4.00E-07  | 358  |
| WTH001_0012_E22 | <i>Serine collagenase 1 precursor</i>                    | <i>SC1</i>    | <b><i>Xenopus laevis</i></b>      | AAH54215     | 5.00E-05  | 358  |
| WTH001_0013_P02 | <i>Serine collagenase 1 precursor</i>                    | <i>SC1</i>    | <i>Celuca pugilator</i>           | AAC47030     | 3.00E-49  | 358  |
| WTH001_0013_L21 | <i>Serine protease</i>                                   | <i>SP</i>     | <i>Pacifastacus leniusculus</i>   | AAX55746     | 4.00E-07  |      |
| RRD03           | <i>Serine-type protease inhibitor</i>                    | <i>Spint</i>  | <i>Boophilus microplus</i>        | CAC82583     | 5.00E-05  |      |
| IGU001_0016_F07 | <i>S-phase kinase-associated protein 1</i>               | <i>Skp1</i>   | <i>Apis mellifera</i>             | XP_392758    | 2.00E-30  | 1367 |
| IGU001_0015_A05 | <i>Sulfate transporter</i>                               | <i>Sfat</i>   | <i>Aedes aegypti</i>              | EAT35825     | 1.00E-27  |      |
| WTH001_0013_B11 | <i>Sulfotransferase 1C2</i>                              | <i>Sult1C</i> | <i>Apis mellifera</i>             | XP_394850    | 1.00E-30  | 716  |
| WTH001_0001_I09 | <i>Triacylglycerol lipase</i>                            | <i>Lip</i>    | <i>Aedes aegypti</i>              | EAT35159     | 2.00E-09  | 848  |

|                 |                                                            |                 |                                |              |          |      |
|-----------------|------------------------------------------------------------|-----------------|--------------------------------|--------------|----------|------|
| WTH001_0003_G14 | <i>Triacylglycerol lipase</i>                              | <i>Lip</i>      | <i>Antheraea yamamai</i>       | BAD22559     | 1.00E-14 | 1039 |
| IGU001_0052_C06 | <i>Tropomyosin 1</i>                                       | <i>Tm1</i>      | <i>Charybdis feriatius</i>     | Q9N2R3       | 2.00E-40 | 110  |
| WTH001_0001_B03 | <i>Trypsin</i>                                             | <i>Try</i>      | <i>Astacus astacus</i>         | P00765       | 7.00E-29 |      |
| WTH001_0003_I06 | <i>Trypsin</i>                                             | <i>Try</i>      | <i>Astacus astacus</i>         | P00765       | 7.00E-29 | 919  |
| WTH001_0003_I15 | <i>Trypsin</i>                                             | <i>Try</i>      | <i>Aplysina fistularis</i>     | AAO12215     | 1.00E-26 |      |
| WTH001_0005_C22 | <i>Trypsin</i>                                             | <i>Try</i>      | <i>Aplysina fistularis</i>     | AAO12215     | 2.00E-13 |      |
| WTH001_0006_C16 | <i>Trypsin</i>                                             | <i>Try</i>      | <i>Artemia franciscana</i>     | AAD39513     | 2.10E-55 | 919  |
| WTH001_0006_G13 | <i>Trypsin</i>                                             | <i>Try</i>      | <i>Aplysina fistularis</i>     | AAO12215     | 3.00E-34 | 936  |
| WTH001_0007_C09 | <i>Trypsin</i>                                             | <i>Try</i>      | <i>Aplysina fistularis</i>     | AAO12215     | 3.00E-57 | 919  |
| WTH001_0007_E05 | <i>Trypsin</i>                                             | <i>Try</i>      | <i>Astacus astacus</i>         | P00765       | 6.00E-31 | 919  |
| WTH001_0007_J17 | <i>Trypsin</i>                                             | <i>Try</i>      | <i>Aplysina fistularis</i>     | AAO12215     | 2.00E-13 |      |
| WTH001_0007_P01 | <i>Trypsin</i>                                             | <i>Try</i>      | <i>Aplysina fistularis</i>     | AAO12215     | 3.00E-57 | 919  |
| WTH001_0009_C12 | <i>Trypsin</i>                                             | <i>Try</i>      | <i>Aplysina fistularis</i>     | AAO12215     | 3.00E-57 | 919  |
| WTH001_0010_I08 | <i>Trypsin</i>                                             | <i>Try</i>      | <i>Aplysina fistularis</i>     | AAO12215     | 3.00E-57 |      |
| WTH001_0011_B16 | <i>Trypsin</i>                                             | <i>Try</i>      | <i>Aplysina fistularis</i>     | AAO12215     | 1.00E-45 |      |
| WTH001_0014_I05 | <i>Trypsin</i>                                             | <i>Try</i>      | <i>Aplysina fistularis</i>     | AAO12215     | 3.00E-57 | 919  |
| WTH001_0014_K17 | <i>Trypsin</i>                                             | <i>Try</i>      | <i>Aplysina fistularis</i>     | AAO12215     | 3.00E-57 | 919  |
| WTH001_0014_L15 | <i>Trypsin</i>                                             | <i>Try</i>      | <i>Aplysina fistularis</i>     | AAO12215     | 3.00E-57 | 919  |
| WTH001_0012_B07 | <i>Ubiquitin</i>                                           | <i>Ubn</i>      | <b>Homo sapiens</b>            | AF108460     | 1.00E-05 | 412  |
| IGU001_0006_G04 | <i>Ubiquitin-like/S30 ribosomal fusion protein</i>         | <i>RpS30</i>    | <i>Lysiphlebus testaceipes</i> | AAX62410     | 4.00E-29 | 186  |
| IGU001_0036_B03 | <i>Vitelline membrane outer layer protein 1</i>            | <i>VMO1</i>     | <b>Canis familiaris</b>        | XP_546575    | 6.00E-25 | 396  |
| IGU001_0035_B07 | <i>Vitellogenin 1</i>                                      | <i>dmagVTG1</i> | <i>Daphnia magna</i>           | BAD05137     | 1.00E-71 | 72   |
| IGU001_0037_A07 | <i>Vitellogenin 1</i>                                      | <i>dmagVTG1</i> | <i>Daphnia magna</i>           | BAD05137     | 2.00E-89 |      |
| WTH001_0006_J12 | <i>Voltage-dependent anion-selective channel protein 2</i> | <i>VDAC2</i>    | <b>Gallus gallus</b>           | AAF73513     | 1.00E-61 | 1363 |
| WTH001_0003_C17 | <i>Voltage-gated Ca channel-related</i>                    | <i>VGCa</i>     | <i>Tribolium castaneum</i>     | XP_967004    | 8.00E-28 | 699  |
| WTH001_0001_L02 | <i>Zinc finger AN1-type</i>                                | <i>Znf_AN1</i>  | <i>Apis mellifera</i>          | XP_001121310 | 7.00E-09 | 1170 |
| WTH001_0009_N03 | Unknown                                                    |                 |                                |              |          | 68   |
| WTH001_0011_B21 | Unknown                                                    |                 |                                |              |          | 80   |
| WTH001_0012_G15 | Unknown                                                    |                 |                                |              |          | 95   |
| WTH001_0009_A18 | Unknown                                                    |                 |                                |              |          | 165  |
| WTH001_0009_D07 | Unknown                                                    |                 |                                |              |          | 295  |
| WTH001_0009_K20 | Unknown                                                    |                 |                                |              |          | 324  |
| WTH001_0009_N07 | Unknown                                                    |                 |                                |              |          | 726  |
| WTH001_0010_E16 | Unknown                                                    |                 |                                |              |          | 726  |
| WTH001_0010_G07 | Unknown                                                    |                 |                                |              |          | 726  |
| WTH001_0010_O02 | Unknown                                                    |                 |                                |              |          | 726  |
| WTH001_0011_G05 | Unknown                                                    |                 |                                |              |          | 865  |
| WTH001_0011_I19 | Unknown                                                    |                 |                                |              |          | 888  |
| WTH001_0013_K18 | Unknown                                                    |                 |                                |              |          | 975  |
| WTH001_0007_B09 | Unknown                                                    |                 |                                |              |          | 1237 |

|                 |         |
|-----------------|---------|
| IGU001_0002_G07 | Unknown |
| IGU001_0003_H10 | Unknown |
| IGU001_0004_D12 | Unknown |
| IGU001_0004_E05 | Unknown |
| IGU001_0009_A08 | Unknown |
| IGU001_0009_B02 | Unknown |
| IGU001_0009_F02 | Unknown |
| IGU001_0010_H09 | Unknown |
| IGU001_0011_F07 | Unknown |
| IGU001_0015_D01 | Unknown |
| IGU001_0023_B07 | Unknown |
| IGU001_0024_H08 | Unknown |
| IGU001_0025_E06 | Unknown |
| IGU001_0026_F04 | Unknown |
| IGU001_0027_A05 | Unknown |
| IGU001_0027_C01 | Unknown |
| IGU001_0027_C11 | Unknown |
| IGU001_0028_D10 | Unknown |
| IGU001_0029_E02 | Unknown |
| IGU001_0030_G09 | Unknown |
| IGU001_0031_A02 | Unknown |
| IGU001_0031_E02 | Unknown |
| IGU001_0033_E06 | Unknown |
| IGU001_0034_B07 | Unknown |
| IGU001_0034_E10 | Unknown |
| IGU001_0035_B08 | Unknown |
| IGU001_0037_B09 | Unknown |
| IGU001_0037_F08 | Unknown |
| IGU001_0041_D10 | Unknown |
| IGU001_0042_A08 | Unknown |
| IGU001_0042_D04 | Unknown |
| IGU001_0044_F02 | Unknown |
| IGU001_0047_D10 | Unknown |
| IGU001_0047_E12 | Unknown |
| IGU001_0047_F03 | Unknown |
| IGU001_0047_G11 | Unknown |
| IGU001_0048_B09 | Unknown |
| IGU001_0048_F05 | Unknown |
| IGU001_0049_E12 | Unknown |
| IGU001_0050_D03 | Unknown |

|                  |         |
|------------------|---------|
| IGU001_0050_G10  | Unknown |
| IGU001_0051_C06  | Unknown |
| IGU001_0052_A02  | Unknown |
| IGU001_0052_D12  | Unknown |
| IGU001_0052_E08  | Unknown |
| IGU001_0055_D11  | Unknown |
| R01CDF1B02       | Unknown |
| R01CDF1F03       | Unknown |
| R08CDR4B08       | Unknown |
| R15LFF1A02       | Unknown |
| RAA06            | Unknown |
| WTH001__0014_I07 | Unknown |
| WTH001_0001_C23  | Unknown |
| WTH001_0001_J03  | Unknown |
| WTH001_0001_M03  | Unknown |
| WTH001_0002_D02  | Unknown |
| WTH001_0002_E06  | Unknown |
| WTH001_0002_G23  | Unknown |
| WTH001_0002_I16  | Unknown |
| WTH001_0003_K14  | Unknown |
| WTH001_0003_L13  | Unknown |
| WTH001_0003_O05  | Unknown |
| WTH001_0004_E01  | Unknown |
| WTH001_0004_H21  | Unknown |
| WTH001_0004_J01  | Unknown |
| WTH001_0005_D02  | Unknown |
| WTH001_0005_L14  | Unknown |
| WTH001_0006_A14  | Unknown |
| WTH001_0006_E21  | Unknown |
| WTH001_0006_F04  | Unknown |
| WTH001_0006_K12  | Unknown |
| WTH001_0007_A03  | Unknown |
| WTH001_0012_M07  | Unknown |
| WTH001_0013_N24  | Unknown |
| WTH001_0013_O23  | Unknown |

---

<sup>a</sup>Sequences for clone ID IGU001\_XXXX\_XXX and WTH001\_XXXX\_XXX are available on DaphniaBase [55]. RXXXXXXXXX clones are available on the website of the *Daphnia* research group of the University of Reading [56]. Clone ID AD2C06 is published on GenBank [52] under accession no. EH669342; <sup>b</sup>Non-invertebrate species matches are indicated in bold font; <sup>c</sup>Contig sequences are available on DaphniaBase [55]. Note that some genes match more than one contig, however multiple contig sequences match similar BLAST annotations.
