# Supplementary material for: Systems biology meets stress ecology: linking molecular and organismal stress responses in Daphnia magna
Source: PubMed Central journal article supplement (PMC2374704; doi:10.1186/gb-2008-9-2-r40), 2008-02-21
Supplement: gb-2008-9-2-r40-S2.pdf [file gb-2008-9-2-r40-S2.pdf]

**Additional data file 2. Differentially expressed *Daphnia magna* genes following acute exposure to ibuprofen (IB)\*.**

| Putative gene                                                   | 20 mg IB l <sup>-1</sup> | 40 mg IB l <sup>-1</sup> | 80 mg IB l <sup>-1</sup> | GO#        | GO description                                              |
|-----------------------------------------------------------------|--------------------------|--------------------------|--------------------------|------------|-------------------------------------------------------------|
| <b>1. METABOLISM</b>                                            |                          |                          |                          |            |                                                             |
| 5'-nucleotidase-related                                         | 1.122                    | 0.503                    | 0.355                    | GO:0009435 | NAD biosynthesis                                            |
| Acyl CoA synthetase                                             | 0.736                    | 0.543                    | 0.430                    | GO:0004467 | long-chain-fatty-acid-CoA ligase activity                   |
| ADP/ATP translocase                                             | 0.607                    | 0.484                    | 0.258                    | GO:0005471 | ATP:ADP antiporter activity                                 |
| Alpha amylase                                                   | 1.223                    | 1.355                    | 1.588                    | GO:0004556 | alpha-amylase activity                                      |
| Astacin                                                         | 0.927                    | 0.794                    | 0.419                    | GO:0008533 | astacin activity (metalloendopeptidase activity)            |
| ATP synthase a chain <sup>a</sup>                               | 1.114                    | 1.142                    | 0.972                    | GO:0015986 | ATP synthesis coupled proton transport                      |
| Bovine pancreatic trypsin inhibitor domain                      | 1.327                    | 1.363                    | 1.725                    | GO:0004867 | serine-type endopeptidase inhibitor activity                |
| Carboxypeptidase A2                                             | 1.362                    | 1.499                    | 0.688                    | GO:0004182 | carboxypeptidase A activity                                 |
| Cathepsin L-like protease precursor <sup>a</sup>                | 1.515                    | 1.455                    | 1.734                    | GO:0004217 | cathepsin L activity (proteolysis)                          |
| Chitinase <sup>a</sup>                                          | 1.255                    | 1.541                    | 2.043                    | GO:0006036 | cuticle chitin catabolism                                   |
| Chymotrypsin B2 <sup>a</sup>                                    | 0.956                    | 1.253                    | 1.137                    | GO:0004263 | chymotrypsin activity (proteolysis)                         |
| Cytochrome b <sup>a</sup>                                       | 1.354                    | 1.454                    | 0.880                    | GO:0006122 | mitochondrial electron transport, ubiquinol to cytochrome c |
| Cytochrome c oxidase subunit 1 <sup>a</sup>                     | 1.216                    | 0.988                    | 0.920                    | GO:0006123 | mitochondrial electron transport, cytochrome c to oxygen    |
| Cytochrome c oxidase subunit 2 <sup>a</sup>                     | 0.639                    | 0.494                    | 0.573                    | GO:0006123 | mitochondrial electron transport, cytochrome c to oxygen    |
| Endo-beta-1,4-mannanase                                         | 2.428                    | 3.046                    | 1.529                    | GO:0004553 | hydrolase activity, hydrolyzing O-glycosyl compounds        |
| Enolase <sup>a</sup>                                            | 2.343                    | 2.236                    | 1.024                    | GO:0004634 | phosphopyruvate hydratase activity (glycolysis)             |
| Glutathione peroxidase                                          | 0.729                    | 0.251                    | 0.889                    | GO:0004602 | glutathione peroxidase activity                             |
| Glycogen phosphorylase                                          | 1.901                    | 1.044                    | 0.509                    | GO:0005980 | glycogen catabolism                                         |
| GM2 ganglioside activator protein <sup>a</sup>                  | 1.635                    | 1.765                    | 1.219                    | GO:0016004 | phospholipase activator activity                            |
| NADH dehydrogenase subunit 4                                    | 1.206                    | 0.344                    | 0.293                    | GO:0008137 | NADH dehydrogenase (ubiquinone) activity                    |
| Leukotriene B <sub>4</sub> 12-hydroxydehydrogenase <sup>b</sup> | 1.192                    | 1.587                    | 3.502                    | GO:0006691 | leukotriene metabolic process                               |
| Rieske iron-sulfur protein                                      | 1.478                    | 1.758                    | 0.980                    | GO:0006118 | electron transport                                          |
| Serine collagenase 1 precursor <sup>a</sup>                     | 1.612                    | 1.887                    | 1.555                    | GO:0006508 | proteolysis                                                 |
| Serine protease                                                 | 0.664                    | 0.463                    | 0.557                    | GO:0006508 | proteolysis                                                 |
| Serine-type protease inhibitor                                  | 0.841                    | 0.655                    | 0.523                    | GO:0006508 | proteolysis                                                 |
| Sulfotransferase 1C2                                            | 1.558                    | 1.339                    | 0.589                    | GO:0008146 | sulfotransferase activity                                   |
| Triacylglycerol lipase <sup>a</sup>                             | 1.307                    | 1.502                    | 2.410                    | GO:0004806 | triacylglycerol lipase activity                             |
| Trypsin <sup>a</sup>                                            | 1.561                    | 1.692                    | 1.358                    | GO:0006508 | proteolysis                                                 |
| <b>2. GENETIC INFORMATION PROCESSING</b>                        |                          |                          |                          |            |                                                             |
| 16S ribosomal RNA <sup>a</sup>                                  | 1.018                    | 1.128                    | 1.155                    | GO:0003735 | structural constituent of ribosome                          |
| 28S ribosomal RNA <sup>a</sup>                                  | 1.398                    | 1.529                    | 1.227                    | GO:0005842 | cytosolic large ribosomal subunit (sensu Eukaryota)         |
| DEAD Box ATP-dependent RNA helicase                             | 1.845                    | 1.147                    | 3.591                    | GO:0000184 | mRNA catabolism, nonsense-mediated decay                    |
| Heat Shock Protein 20                                           | 1.901                    | 2.195                    | 2.848                    | GO:0006986 | response to unfolded protein                                |
| Histone H4                                                      | 0.575                    | 0.523                    | 0.453                    | GO:0006334 | nucleosome assembly                                         |
| Polyubiquitin                                                   | 2.328                    | 2.221                    | 7.229                    | GO:0000209 | protein polyubiquitination                                  |
| Protein disulfide isomerase                                     | 1.035                    | 0.646                    | 0.846                    | GO:0006457 | protein folding                                             |
| Ribosomal protein L14                                           | 1.442                    | 1.626                    | 1.030                    | GO:0006412 | translation                                                 |

|                                             |       |       |        |            |                                   |
|---------------------------------------------|-------|-------|--------|------------|-----------------------------------|
| Ribosomal protein L15                       | 1.076 | 1.362 | 1.558  | GO:0006412 | translation                       |
| Ribosomal protein L22                       | 0.678 | 0.664 | 0.718  | GO:0006412 | translation                       |
| Ribosomal protein L27                       | 0.481 | 0.276 | 0.0925 | GO:0006412 | translation                       |
| Ribosomal protein L28                       | 1.646 | 1.904 | 0.923  | GO:0006412 | translation                       |
| Ribosomal protein L30                       | 1.382 | 2.003 | 1.917  | GO:0006412 | translation                       |
| Ribosomal protein L38                       | 1.755 | 2.559 | 1.469  | GO:0006412 | translation                       |
| Ribosomal protein L6                        | 3.063 | 1.611 | 0.814  | GO:0006412 | translation                       |
| Ribosomal protein L9                        | 0.866 | 0.518 | 0.362  | GO:0006412 | translation                       |
| Ribosomal protein S10                       | 0.981 | 0.698 | 1.140  | GO:0006412 | translation                       |
| Ribosomal protein S12                       | 1.408 | 1.540 | 2.125  | GO:0006412 | translation                       |
| Ribosomal protein S13                       | 0.648 | 0.795 | 0.705  | GO:0006412 | translation                       |
| Ribosomal protein S17                       | 0.928 | 0.839 | 0.591  | GO:0006412 | translation                       |
| Ribosomal protein S2                        | 1.414 | 1.269 | 2.347  | GO:0006412 | translation                       |
| Ribosomal protein S20                       | 1.734 | 2.011 | 0.717  | GO:0006412 | translation                       |
| Ribosomal protein S25                       | 1.664 | 1.951 | 1.178  | GO:0006412 | translation                       |
| Ribosomal protein S3A <sup>a</sup>          | 1.510 | 1.415 | 2.703  | GO:0006412 | translation                       |
| Ribosomal protein S4                        | 1.396 | 1.526 | 2.133  | GO:0006412 | translation                       |
| Selenoprotein 15                            | 5.031 | 5.960 | 2.462  | GO:0051084 | posttranslational protein folding |
| Ubinuclein                                  | 0.971 | 0.750 | 0.420  | GO:0008134 | transcription factor binding      |
| Ubiquitin-like/S30 ribosomal fusion protein | 1.640 | 1.658 | 1.829  | GO:0006412 | translation                       |

### 3. ENVIRONMENT INFORMATION PROCESSING

|                                                     |       |       |       |            |                                                        |
|-----------------------------------------------------|-------|-------|-------|------------|--------------------------------------------------------|
| Contactin 1                                         | 1.223 | 0.823 | 0.246 | GO:0007155 | cell adhesion                                          |
| C-terminal binding protein                          | 1.311 | 0.556 | 0.684 | GO:0008285 | negative regulation of cell proliferation              |
| Heat Shock Protein 70                               | 1.928 | 2.542 | 1.650 | GO:0006986 | response to unfolded protein                           |
| Innexin 2                                           | 2.594 | 1.698 | 0.981 | GO:0015286 | innexin channel activity                               |
| Insect pheromone-binding protein A10                | 2.770 | 1.740 | 2.054 | GO:0007606 | sensory perception of chemical stimulus                |
| Pleiotrophin                                        | 1.436 | 1.457 | 1.881 | GO:0008083 | growth factor activity                                 |
| RAS-like GTP-binding protein                        | 2.111 | 1.904 | 1.637 | GO:0007266 | Rho protein signal transduction                        |
| Receptor expression-enhancing protein 5             | 1.478 | 1.707 | 1.407 | GO:0009401 | phosphoenolpyruvate-dependent sugar phosphotransferase |
| S-phase kinase-associated protein 1                 | 0.656 | 0.743 | 0.784 | GO:0016567 | protein ubiquitination                                 |
| Voltage-dependent anion-selective channel protein 2 | 1.315 | 1.505 | 0.989 | GO:0006820 | anion transport                                        |

### 4. CELLULAR PROCESSES

|                                                           |       |       |       |            |                                                                |
|-----------------------------------------------------------|-------|-------|-------|------------|----------------------------------------------------------------|
| Actin <sup>a</sup>                                        | 1.138 | 0.776 | 0.654 | GO:0005200 | structural constituent of cytoskeleton                         |
| Calcification-associated peptide-2 precursor <sup>a</sup> | 0.751 | 0.373 | 0.508 | GO:0042302 | structural constituent of cuticle                              |
| Chitin-binding domain type 2                              | 2.93  | 1.394 | 0.964 | GO:0008061 | chitin binding                                                 |
| Chitin-binding Peritrophin-A domain                       | 1.530 | 1.313 | 1.176 | GO:0016490 | structural constituent of peritrophic membrane (sensu Insecta) |
| C-type lectin-like                                        | 0.703 | 0.710 | 0.405 | GO:0006954 | inflammatory response                                          |
| CUB domain                                                | 1.039 | 0.996 | 0.562 | GO:0006954 | inflammatory response                                          |
| Cuticle protein 7 <sup>a</sup>                            | 0.823 | 0.428 | 0.447 | GO:0042302 | structural constituent of cuticle                              |
| Cuticle structural protein post-ecdysial PCP16.7          | 0.698 | 0.864 | 0.64  | GO:0042302 | structural constituent of cuticle                              |

|                                                          |       |       |       |            |                                                                |
|----------------------------------------------------------|-------|-------|-------|------------|----------------------------------------------------------------|
| Cuticular protein precursor <sup>a</sup>                 | 0.885 | 1.013 | 1.127 | GO:0042302 | structural constituent of cuticle                              |
| Cysteine-rich intestinal protein                         | 2.217 | 1.192 | 0.452 | GO:0008270 | zinc ion binding                                               |
| DD5                                                      | 0.421 | 0.396 | 0.340 | GO:0042302 | structural constituent of cuticle                              |
| Fatty acid binding protein 3                             | 1.000 | 1.434 | 1.430 | GO:0005504 | fatty acid binding                                             |
| Ferritin <sup>a</sup>                                    | 1.280 | 1.460 | 1.952 | GO:0006879 | iron ion homeostasis                                           |
| Ferritin 1-like protein A                                | 1.915 | 1.866 | 1.716 | GO:0006879 | iron ion homeostasis                                           |
| Gasp precursor                                           | 4.301 | 2.742 | 1.541 | GO:0016490 | structural constituent of peritrophic membrane (sensu Insecta) |
| Gram-negative bacteria binding protein                   | 0.902 | 0.786 | 0.505 | GO:0045088 | regulation of innate immune response                           |
| Haemoglobin 1                                            | 0.884 | 0.402 | 0.456 | GO:0015671 | oxygen transport                                               |
| Haemoglobin 2 <sup>a</sup>                               | 1.475 | 1.024 | 0.970 | GO:0015671 | oxygen transport                                               |
| Insect cuticle protein (Chitin_bind_4)                   | 0.694 | 0.884 | 0.575 | GO:0042302 | structural constituent of cuticle                              |
| Juvenile hormone esterase                                | 0.528 | 0.218 | 0.102 | GO:0006719 | juvenile hormone catabolism                                    |
| Lipoprotein N-terminal Domain (VTG related) <sup>a</sup> | 0.825 | 0.533 | 0.707 | GO:0005319 | lipid transporter activity                                     |
| Myosin regulatory light chain 2                          | 1.717 | 0.983 | 1.786 | GO:0006940 | regulation of smooth muscle contraction                        |
| Na <sup>+</sup> /K <sup>+</sup> ATPase alpha subunit     | 1.410 | 1.332 | 1.234 | GO:0005391 | sodium:potassium-exchanging ATPase activity                    |
| Reelin                                                   | 1.309 | 1.486 | 1.336 | GO:0000904 | cellular morphogenesis during differentiation                  |
| Sulfate transporter                                      | 0.424 | 0.278 | 0.351 | GO:0008272 | sulfate transport                                              |
| Tropomyosin 1                                            | 1.698 | 1.673 | 1.281 | GO:0006936 | muscle contraction                                             |
| Vitelline membrane outer layer protein 1                 | 0.713 | 0.812 | 0.863 | GO:0009993 | oogenesis (sensu Insecta)                                      |
| Vitellogenin 1 <sup>a</sup>                              | 1.083 | 1.143 | 1.723 | GO:0007296 | vitellogenesis                                                 |
| Voltage-gated Ca channel-related                         | 3.713 | 3.245 | 3.760 | GO:0006812 | cation transport                                               |
| Zinc finger AN1-type                                     | 1.425 | 0.731 | 0.877 | GO:0008270 | zinc ion binding                                               |

\*Genes have been categorised based on their gene ontology (GO) annotation. Exposed expression levels are shown relative to controls; <sup>a</sup>Expression data of redundant genes, aligned in the same sequence contig or with identical annotations, are shown as averages; <sup>b</sup>*Leukotriene B<sub>4</sub> 12-hydroxydehydrogenase (Ltb4dh)* responded on the microarray, but the fluorescent emission levels were below the set detection criteria. However, previously QPCR data validate a concentration-dependent induction of *Ltb4dh* (see Heckmann et al., 2006 [21]).
