# Supplementary material for: Systems biology meets stress ecology: linking molecular and organismal stress responses in Daphnia magna
Source: PubMed Central journal article supplement (PMC2374704; doi:10.1186/gb-2008-9-2-r40), 2008-02-21
Supplement: gb-2008-9-2-r40-S3.pdf [file gb-2008-9-2-r40-S3.pdf]

**Additional data file 3. Real-time quantitative PCR (QPCR) confirmation of selected *Daphnia magna* genes responding on cDNA microarray following acute exposure to ibuprofen (IB)<sup>a</sup>.**

|                                                     | 0 mg IB l <sup>-1</sup> | 20 mg IB l <sup>-1</sup>    | 40 mg IB l <sup>-1</sup>    | 80 mg IB l <sup>-1</sup>    | R <sup>2</sup> -values <sup>b</sup> | Primers (5'-3') <sup>e</sup>                  | Amplicon size (bp) | Amplification efficiency (E) <sup>f</sup> |
|-----------------------------------------------------|-------------------------|-----------------------------|-----------------------------|-----------------------------|-------------------------------------|-----------------------------------------------|--------------------|-------------------------------------------|
| <i>C-type Lectin like (CLECT)</i> <sup>c</sup>      | 1.000<br>1.000±0.081    | 0.703±0.336<br>0.812±0.062  | 0.710±0.296<br>0.695±0.017* | 0.405±0.016<br>0.477±0.044* | 0.92 (L)                            | TTCCACGTGAAACCCTAAC<br>CCACTCCCGTCCAGTAGGTA   | 88                 | 1.038±0.046                               |
| <i>Glutathione Peroxidase (GPX)</i>                 | 1.000<br>1.000±0.043    | 0.729±5.156<br>0.862±0.012* | 0.251±0.054<br>0.895±0.041  | 0.889±3.588<br>1.113±0.027  | 0.95 (C)                            | ACTTCCAGCCGAACATAACG<br>GAGTCGTCGGACAGCTTCTT  | 99                 | 1.017±0.018                               |
| <i>Juvenile Hormone Esterase (JHE)</i> <sup>c</sup> | 1.000<br>1.000±0.119    | 0.528±0.551<br>0.726±0.148  | 0.218±0.030<br>0.492±0.027* | 0.102±0.178<br>0.173±0.028* | 0.87 (L)                            | ATGGAGTTCTCAACGGAACG<br>ATCTCAGGTGTGGGCATTC   | 100                | 0.896±0.016                               |
| <i>Triacylglycerol Lipase (Lip)</i> <sup>cd</sup>   | 1.000<br>1.000±0.044    | 1.307±0.189<br>2.129±0.599  | 1.502±0.194<br>2.757±0.101* | 2.410±2.077<br>6.124±0.395* | 1.00 (L)                            | CTGTTTATTGGCGACATTGC<br>TAGCCGTTCACTTCTCCAACC | 95                 | 0.941±0.025                               |
| <i>Ubiquitin (Ubn)</i>                              | 1.000<br>1.000±0.104    | 0.971±0.142<br>0.799±0.075  | 0.750±0.164<br>0.809±0.086  | 0.420±0.028<br>1.127±0.046  | 0.56 (C)                            | GGCACAGTGGTTTCCGTATC<br>TGCTTGTTCCGGTGTTACTG  | 81                 | 1.033±0.022                               |
| <i>Vitellogenin 1 (DmagVTG1)</i> <sup>cd</sup>      | 1.000<br>1.000±0.104    | 1.083±0.526<br>0.984±0.049  | 1.143±0.410<br>1.034±0.088  | 1.723±1.502<br>1.232±0.065  | 0.96 (L)                            | CTGGCAAATGGGAAATCAAC<br>CCCAGGTGTAAGCCAAACC   | 93                 | 0.870±0.084                               |

<sup>a</sup>Microarray expression levels are shown in the first line and QPCR expression levels are shown below (mean ± SE,  $n = 3-4$ ). The QPCR amplicons were quantified from *Daphnia* exposed in a comparable independent, previously reported (see Heckmann et al., 2006 [21]), experiment. QPCR expression was calculated using DART-PCR [59] and normalised to a geNorm [60] estimated normalisation factor based on the geometric mean of *actin*, *glyceraldehyde-3-phosphate dehydrogenase* and *ubiquitin conjugating enzyme*. Note that, although being differentially expressed on the microarray, *actin* has previously been verified as a QPCR reference gene [21]. Exposed expression levels are shown relative to controls; <sup>b</sup>R<sup>2</sup>-values of correlated QPCR and microarray expression. Brackets signify a linear (L) or cubic (C) correlation; <sup>c</sup>Significant ( $P < 0.05$ , linear regression) concentration-dependent relationship between IB concentration and relative QPCR expression. Expression levels significant different ( $P < 0.05$ , Student's *t*-test) from controls are indicated by an asterisks (\*); <sup>d</sup>Expression data of redundant microarray genes, aligned in the same sequence contig or with identical annotations, have been averaged; <sup>e</sup>Upper and lower sequences represent forward and reverse primers respectively; <sup>f</sup>Values are mean ± SD (N = 36).
