# Supplementary material for: Systems biology meets stress ecology: linking molecular and organismal stress responses in Daphnia magna
Source: PubMed Central journal article supplement (PMC2374704; doi:10.1186/gb-2008-9-2-r40), 2008-02-21

**Additional data file 4. *Daphnia magna* embryo developmental stage 1-2 (sensu Kast-Hutcheson et al., 2001 [30]).** Embryogenesis was arrested within ~24 h during a 4-8 day maternal exposure to ibuprofen (80 mg l<sup>-1</sup>). Note that arrested embryos were aborted at the same time as healthy neonates were released in the controls (see Table 2).

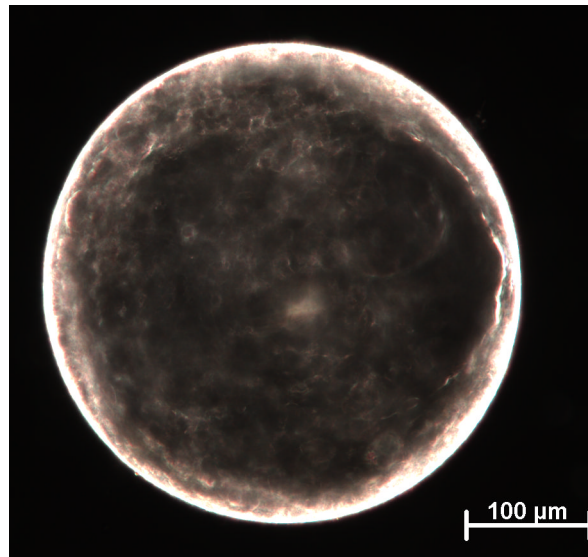

Supplement: gb-2008-9-2-r40-S4.pdf [file gb-2008-9-2-r40-S4.pdf]
