# Supplementary material for: Systems biology meets stress ecology: linking molecular and organismal stress responses in Daphnia magna
Source: PubMed Central journal article supplement (PMC2374704; doi:10.1186/gb-2008-9-2-r40), 2008-02-21
Supplement: gb-2008-9-2-r40-S6.pdf [file gb-2008-9-2-r40-S6.pdf]

Additional data file 6. MA plots of raw and normalised microarray data (ibuprofen-exposed *D. magna*)\*

Raw data (0 mg IB l<sup>-1</sup> replicate 1)

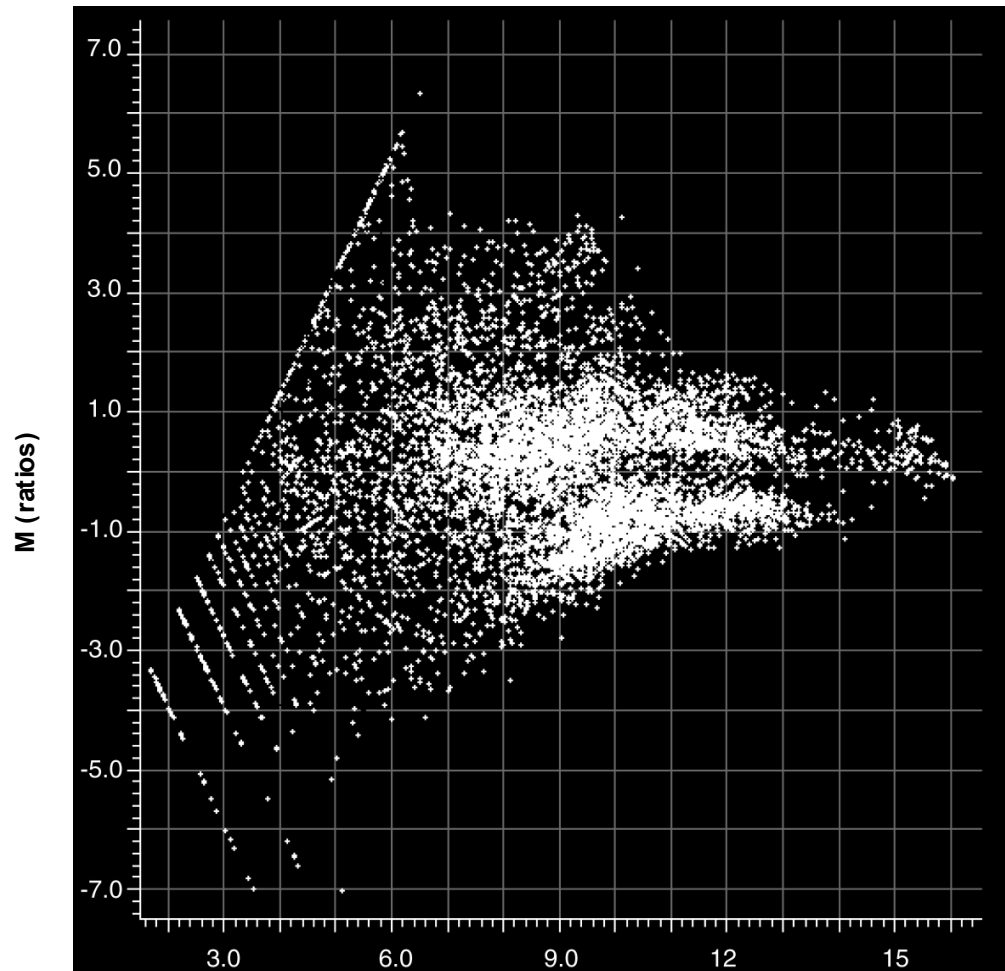

Normalised data (0 mg IB l<sup>-1</sup> replicate 1)

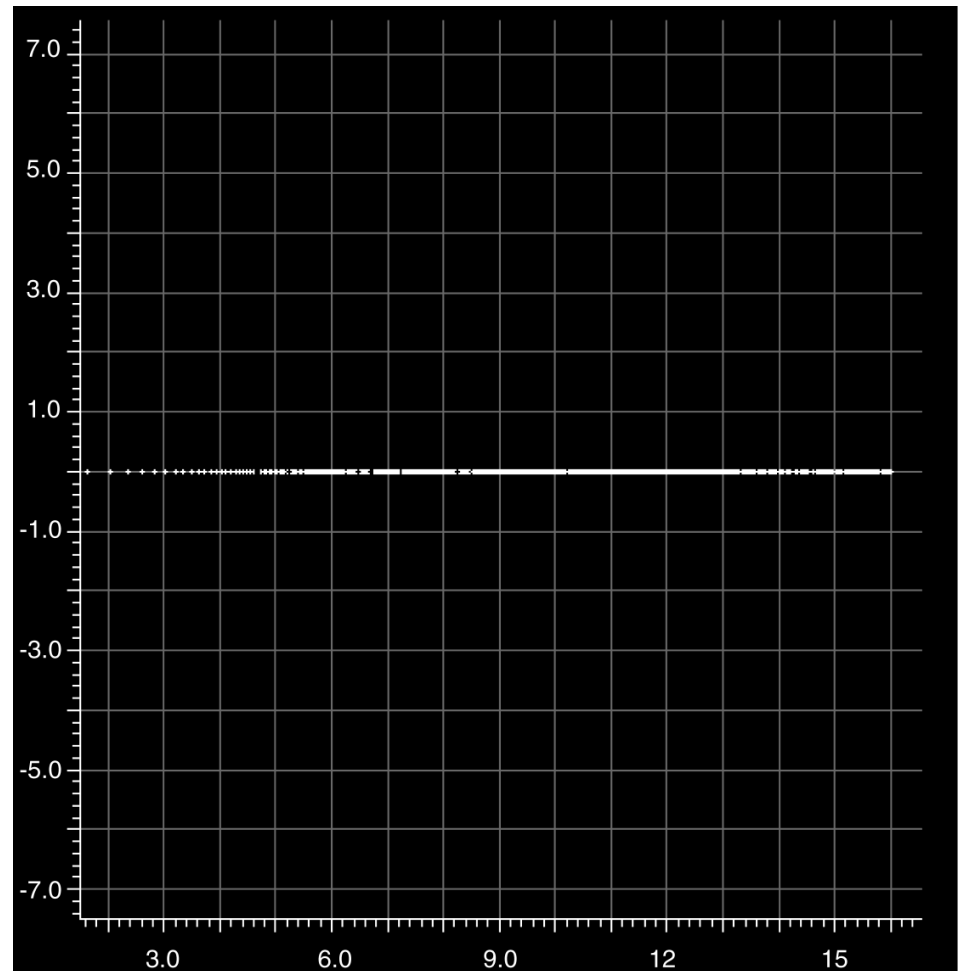

A (intensities)

MA plots continued.

Raw data (20 mg IB l<sup>-1</sup> replicate 1)

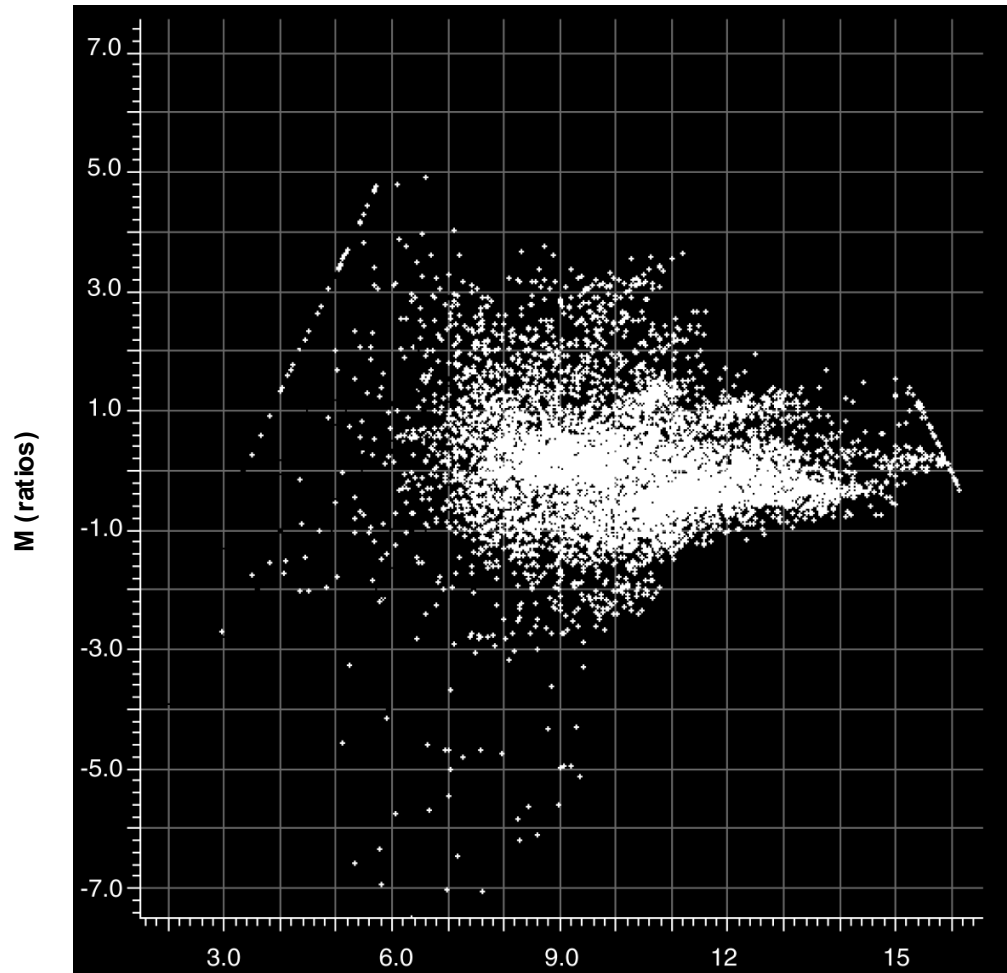

Normalised data (20 mg IB l<sup>-1</sup> replicate 1)

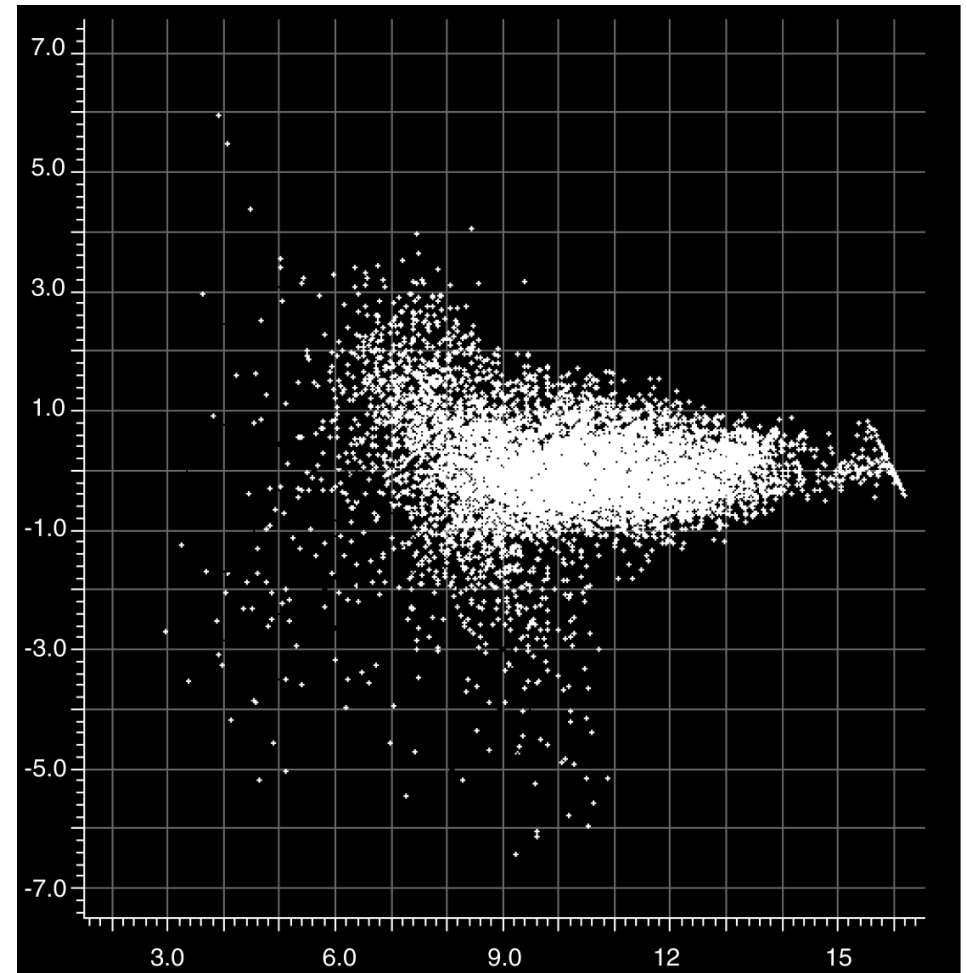

A (intensities)

MA plots continued.

Raw data (40 mg IB  $\Gamma^{-1}$  replicate 1)

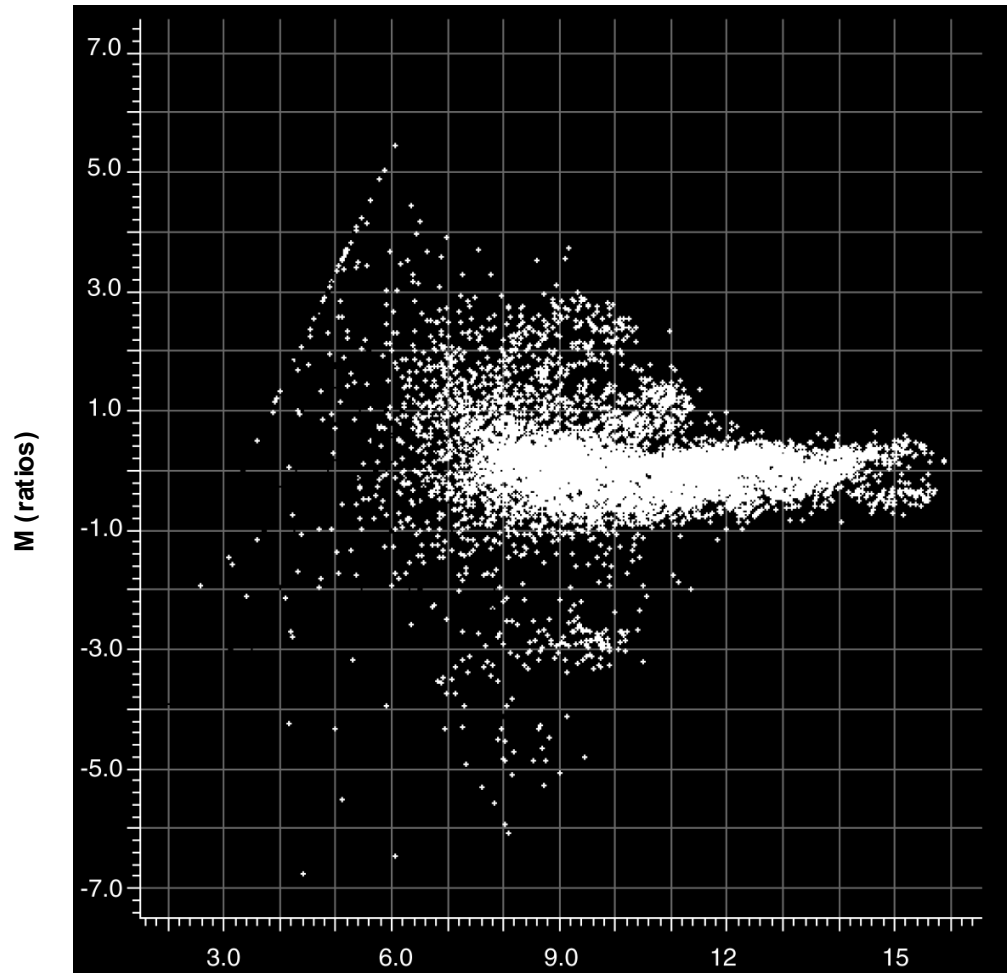

Normalised data (40 mg IB  $\Gamma^{-1}$  replicate 1)

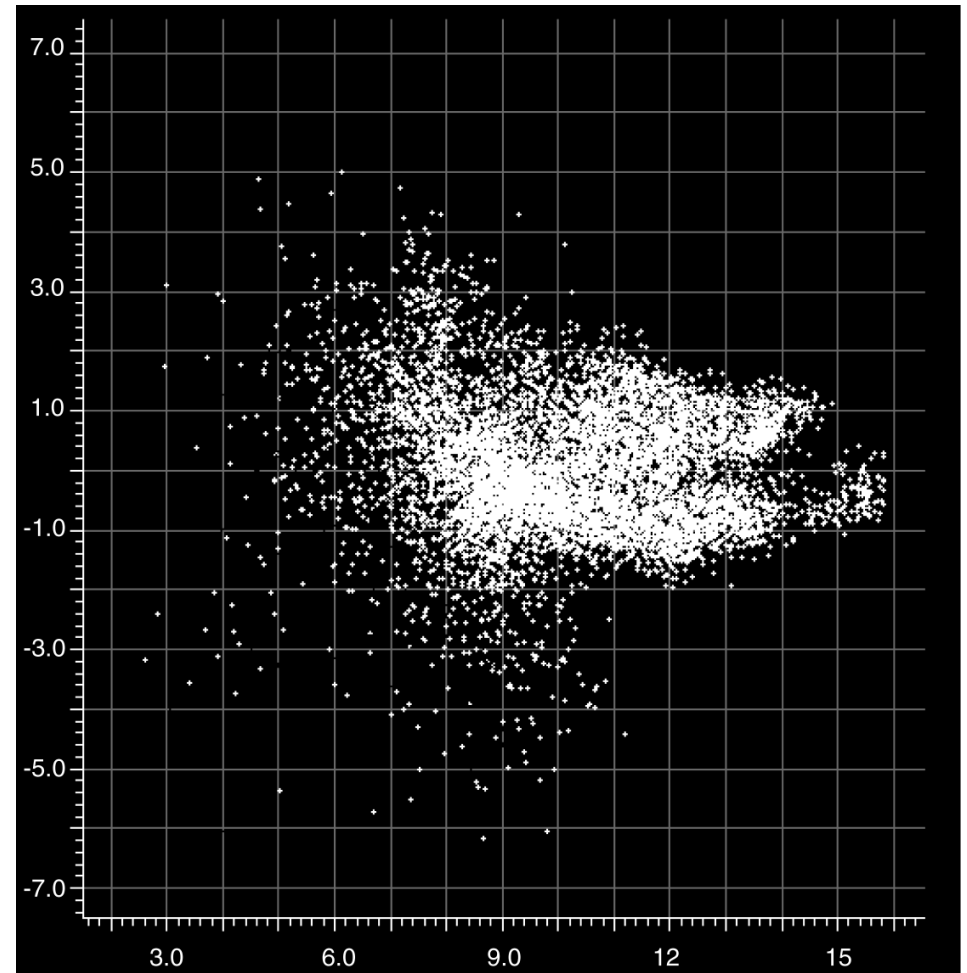

A (intensities)

MA plots continued.

Raw data (80 mg IB  $\Gamma^{-1}$  replicate 1)

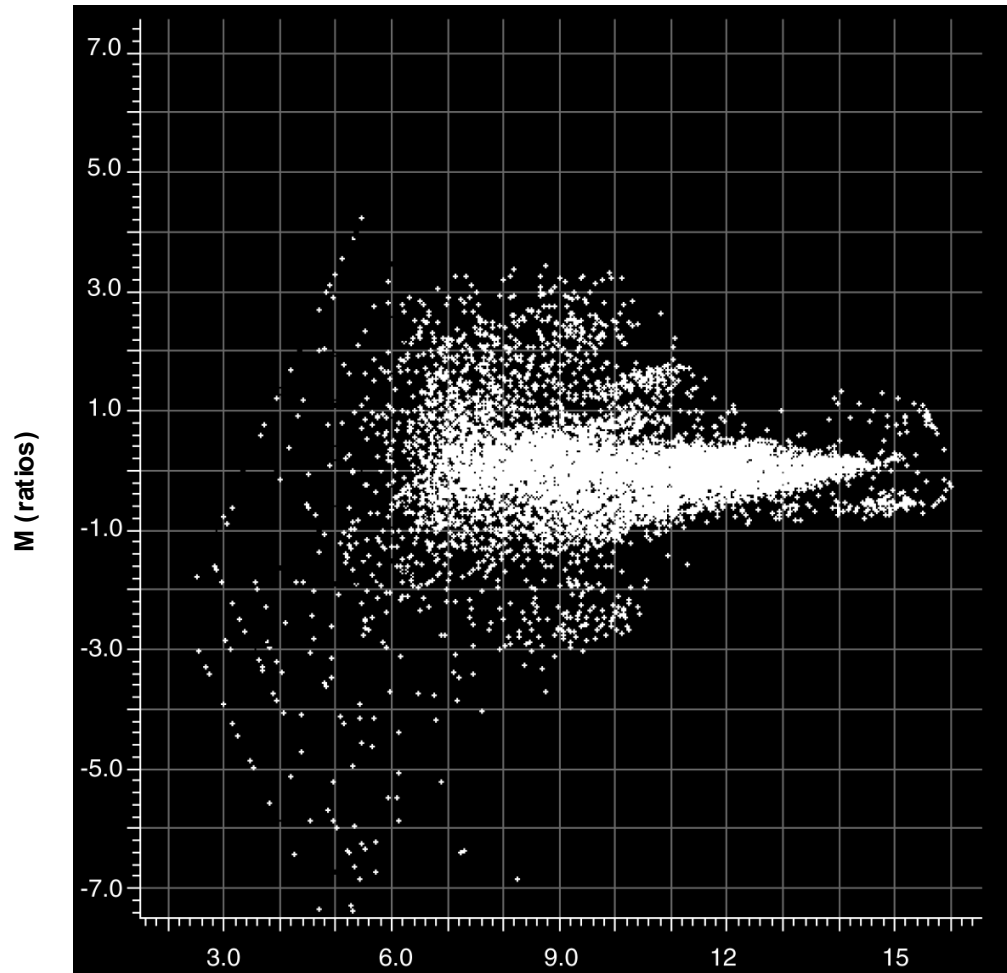

Normalised data (80 mg IB  $\Gamma^{-1}$  replicate 1)

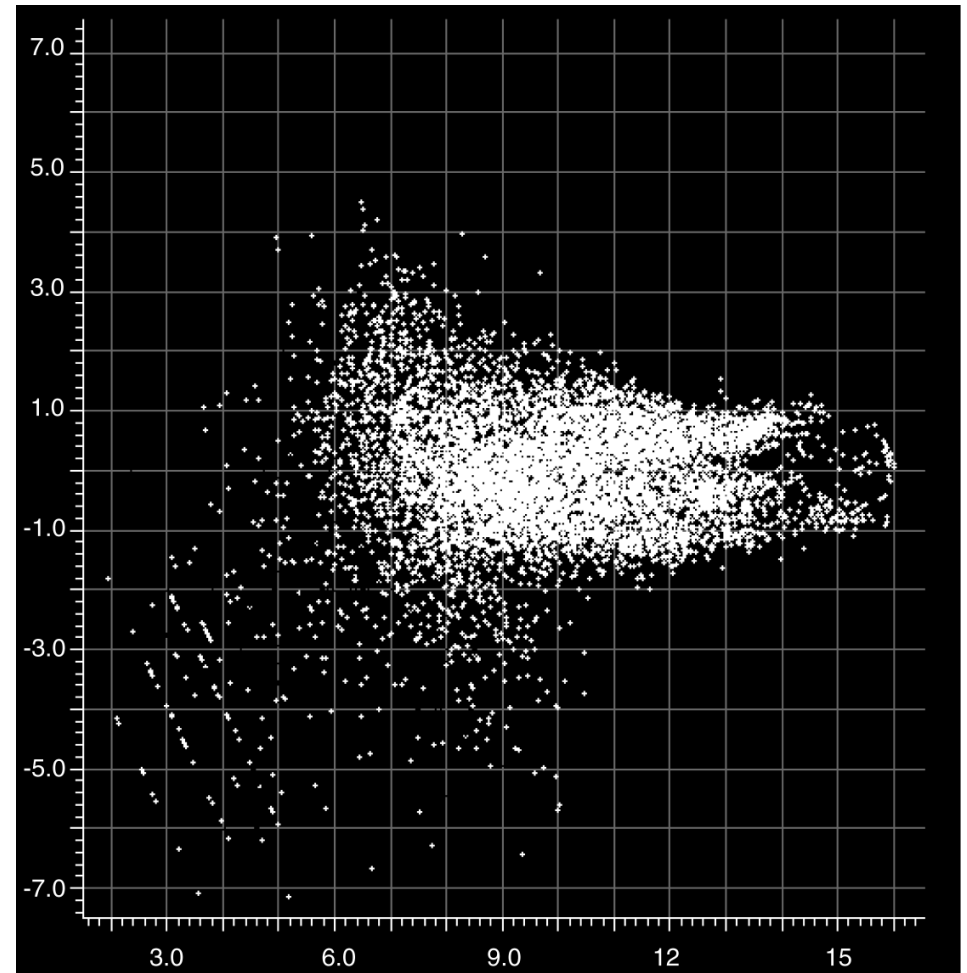

A (intensities)

MA plots continued.

Raw data (0 mg IB l<sup>-1</sup> replicate 2)

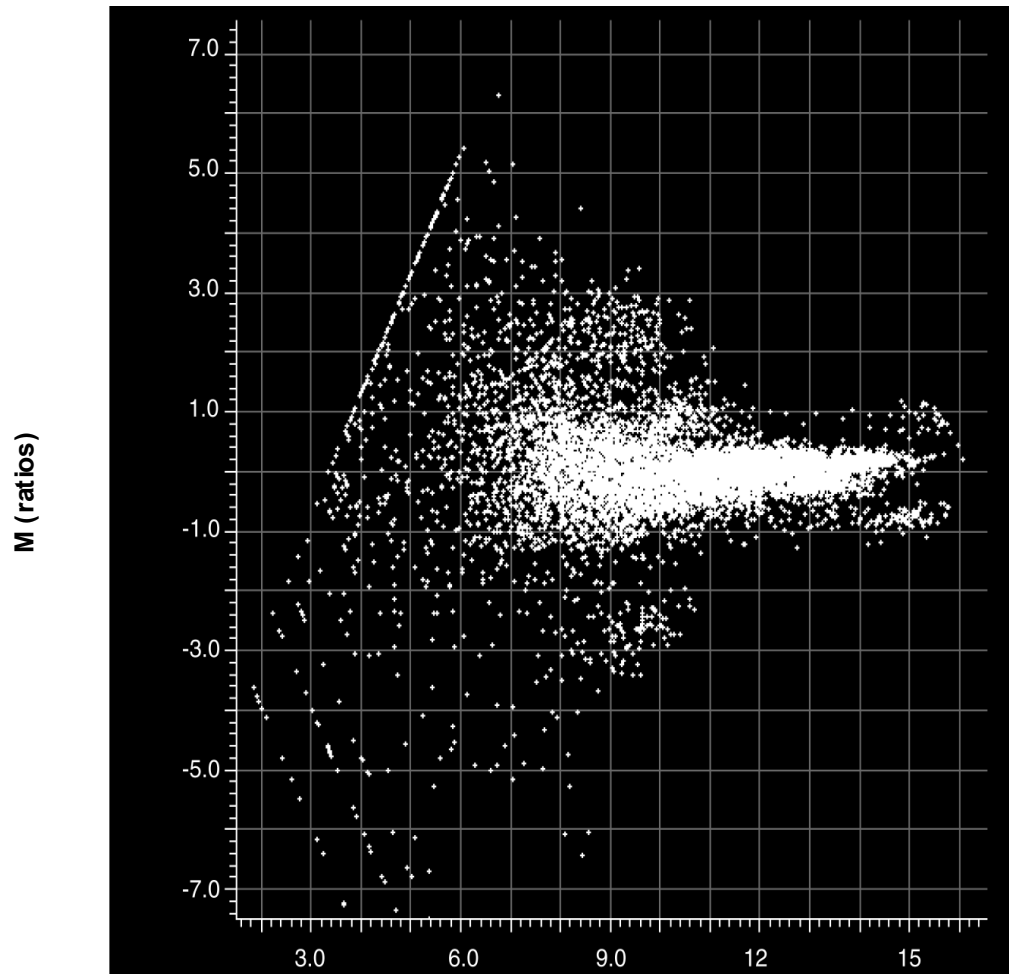

Normalised data (0 mg IB l<sup>-1</sup> replicate 2)

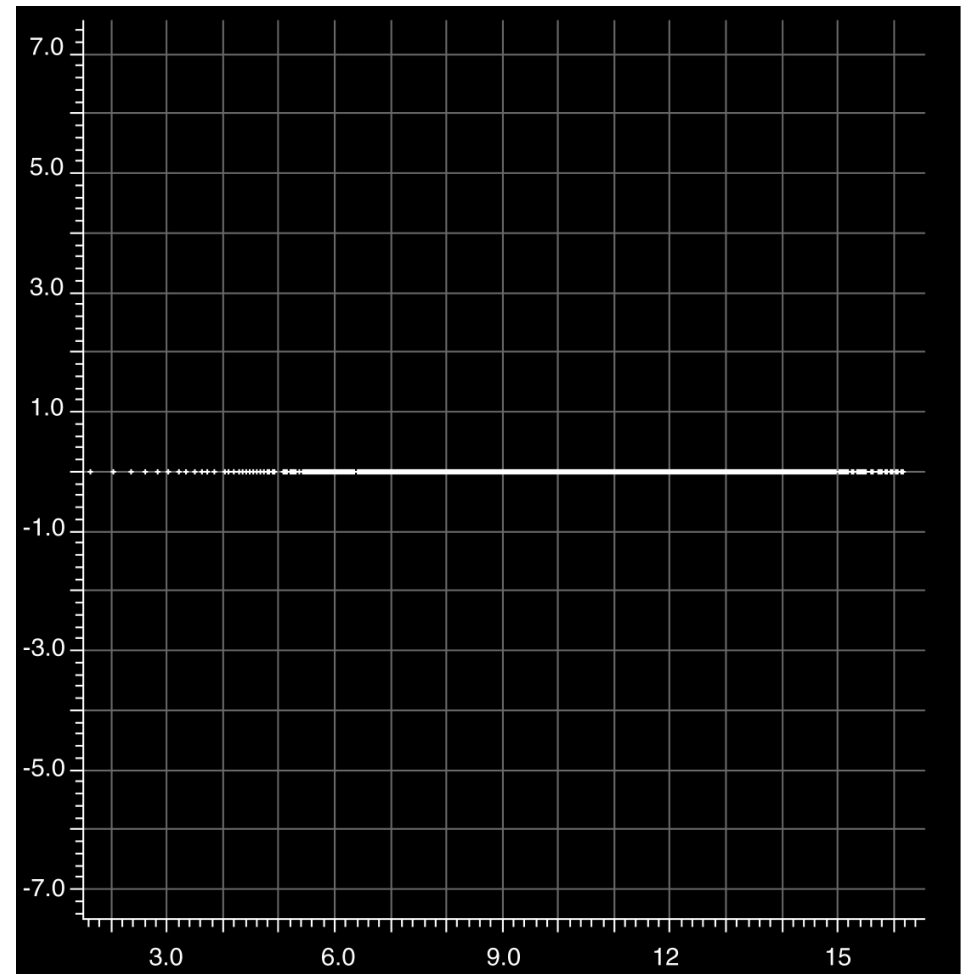

A (intensities)

MA plots continued.

Raw data (20 mg IB l<sup>-1</sup> replicate 2)

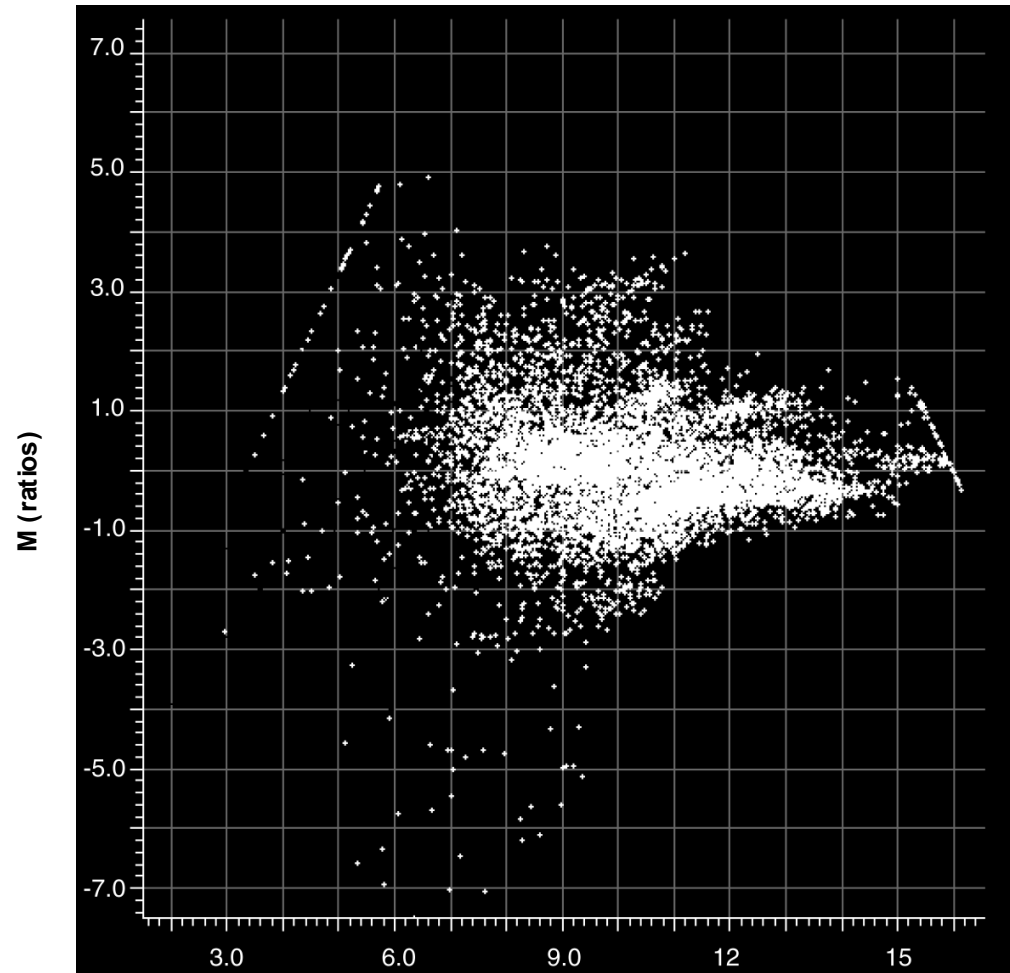

Normalised data (20 mg IB l<sup>-1</sup> replicate 2)

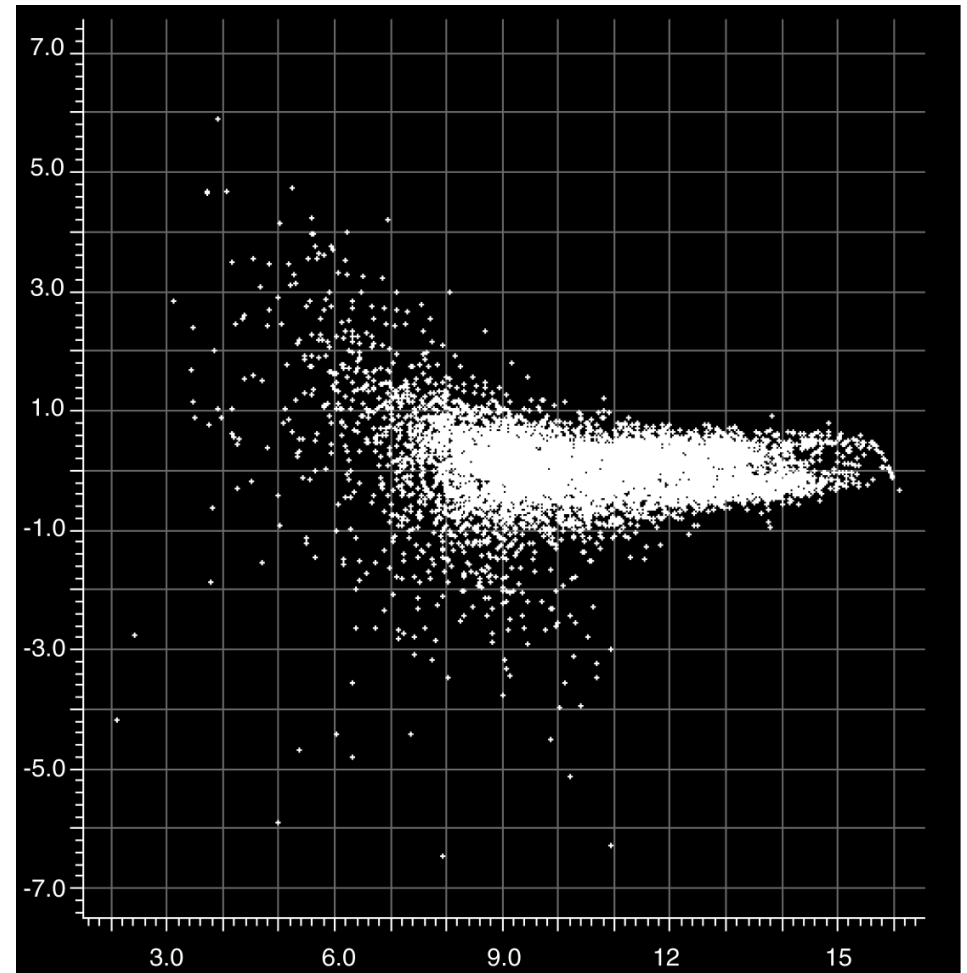

A (intensities)

MA plots continued.

Raw data (40 mg IB  $\Gamma^{-1}$  replicate 2)

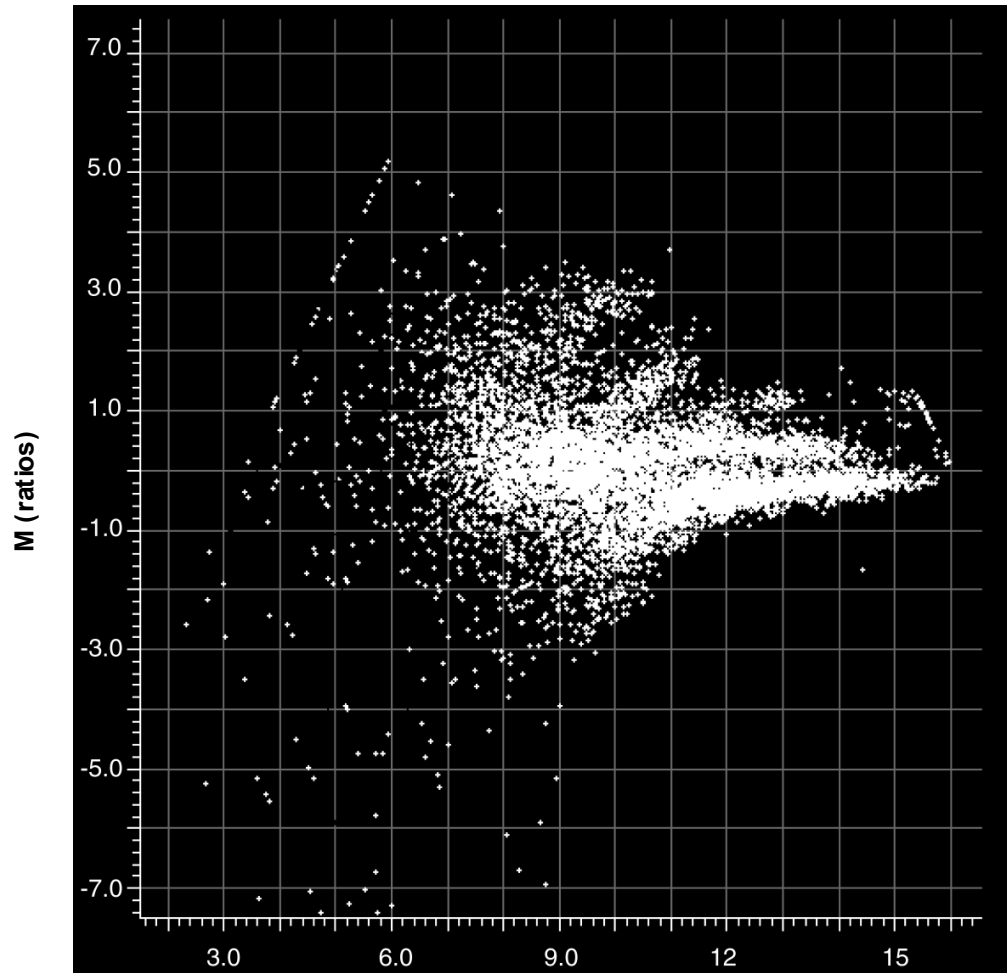

Normalised data (40 mg IB  $\Gamma^{-1}$  replicate 2)

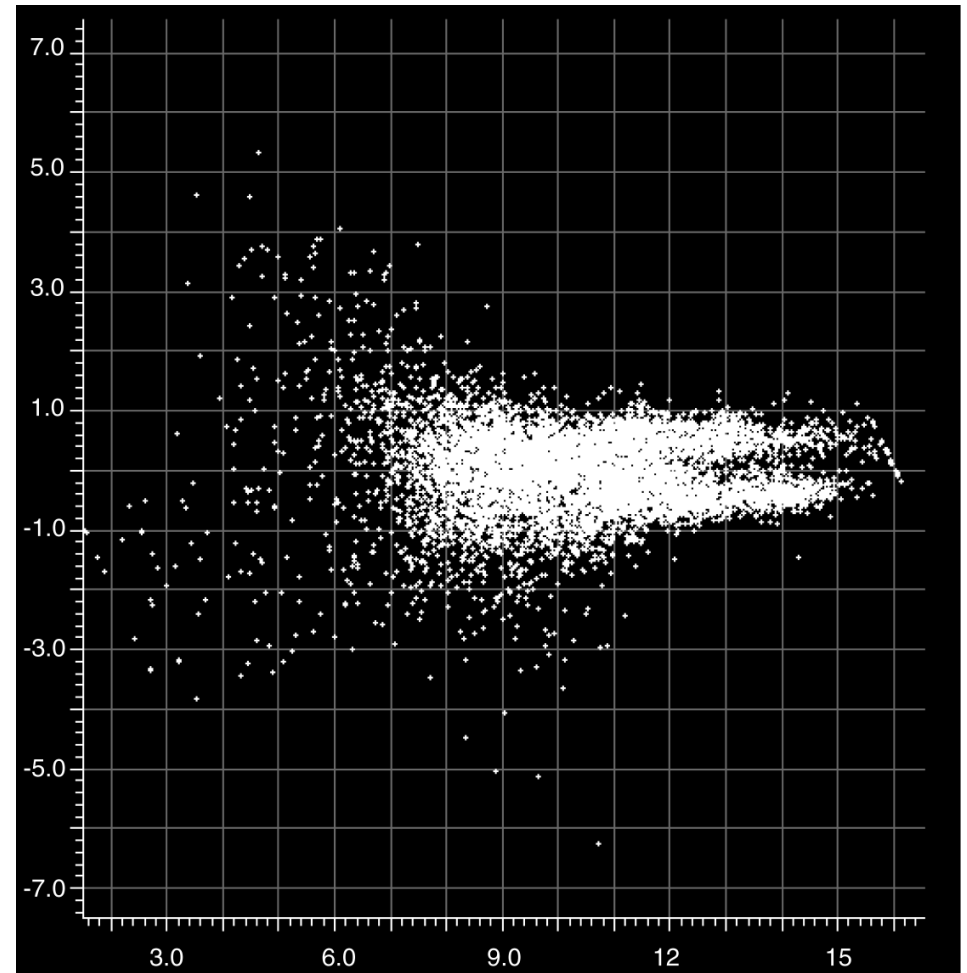

A (intensities)

MA plots continued.

Raw data (0 mg IB l<sup>-1</sup> replicate 3)

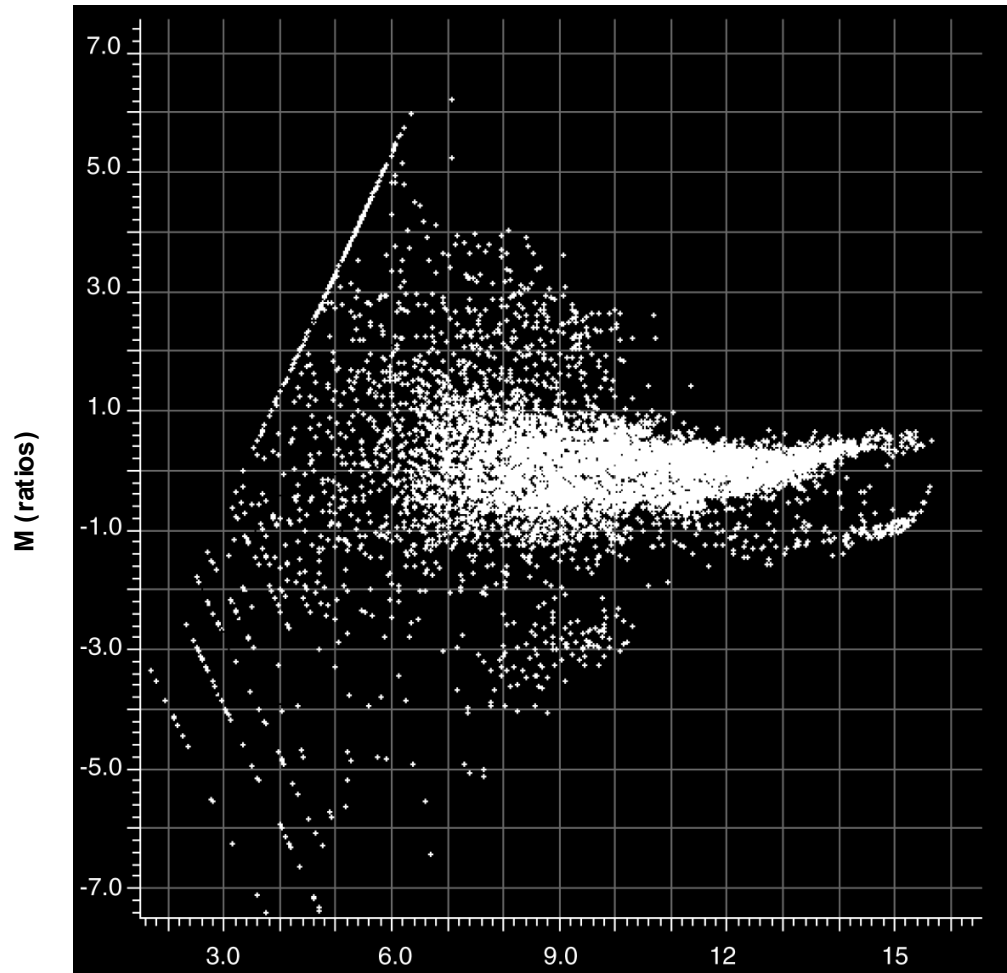

Normalised data (0 mg IB l<sup>-1</sup> replicate 3)

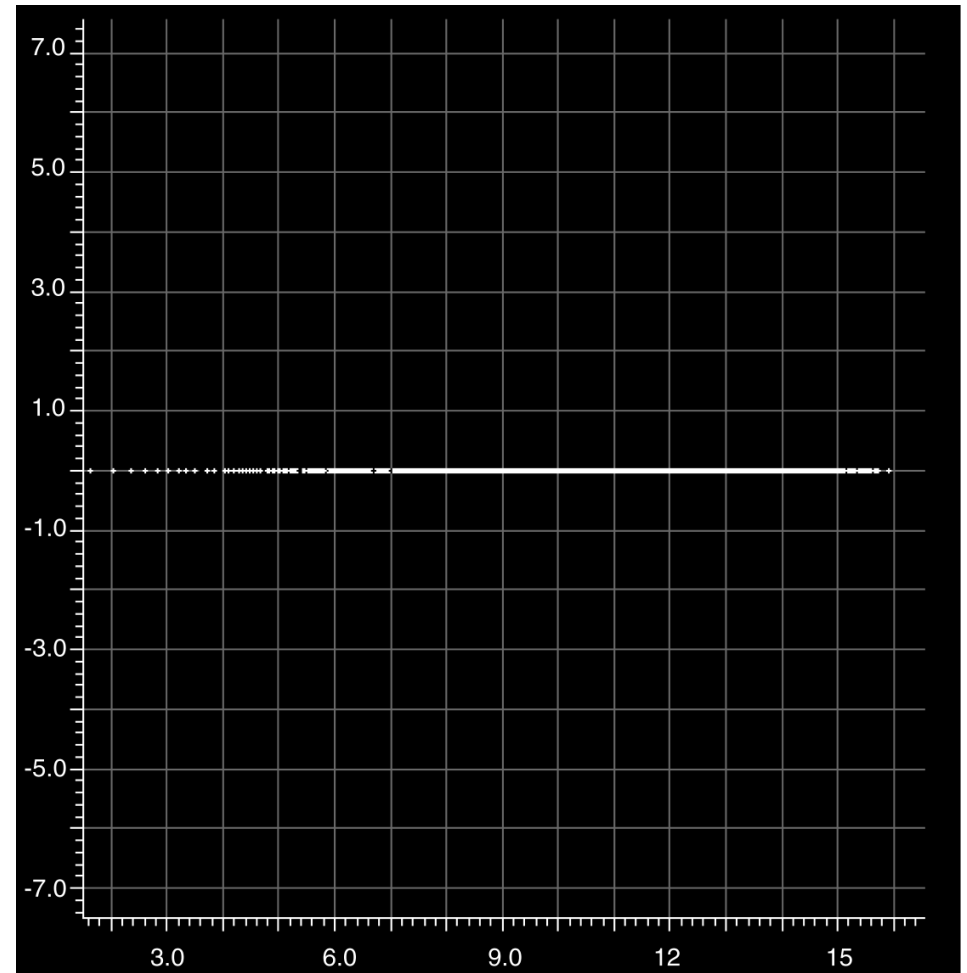

A (intensities)



MA plots continued.

Raw data (20 mg IB  $\Gamma^{-1}$  replicate 3)

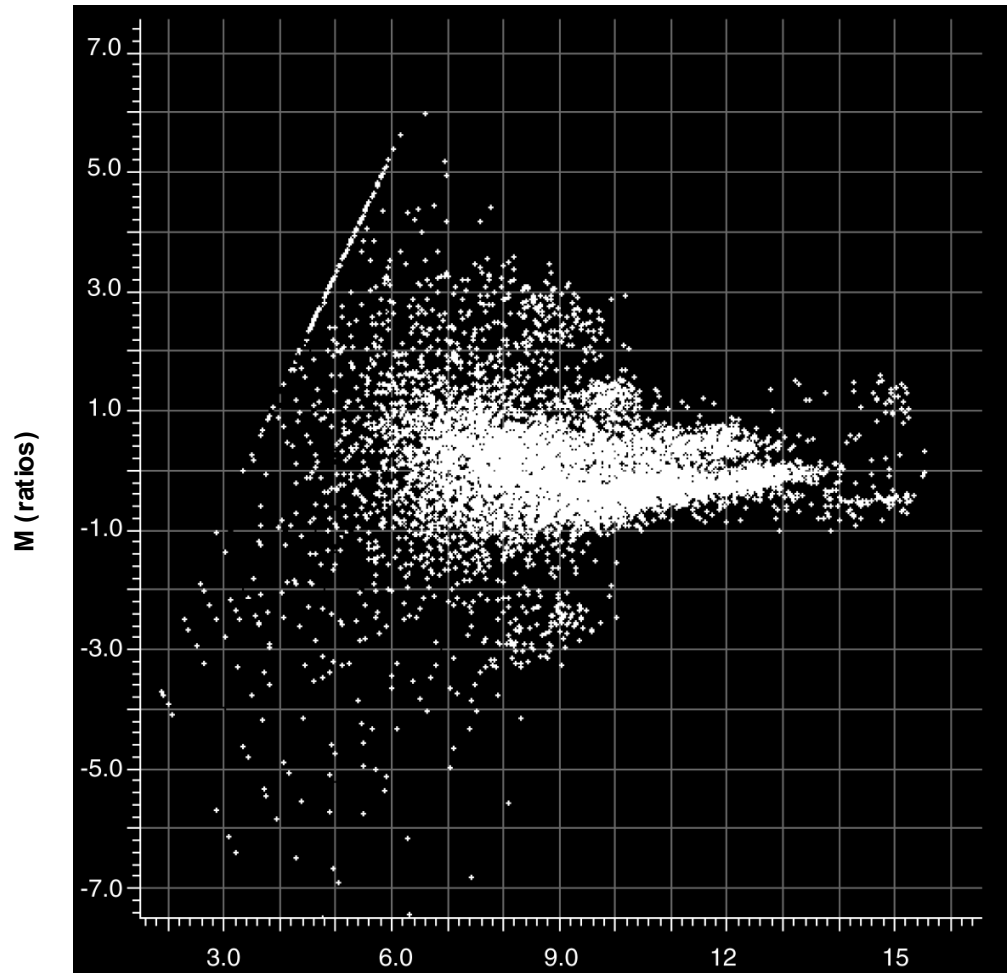

Normalised data (20 mg IB  $\Gamma^{-1}$  replicate 3)

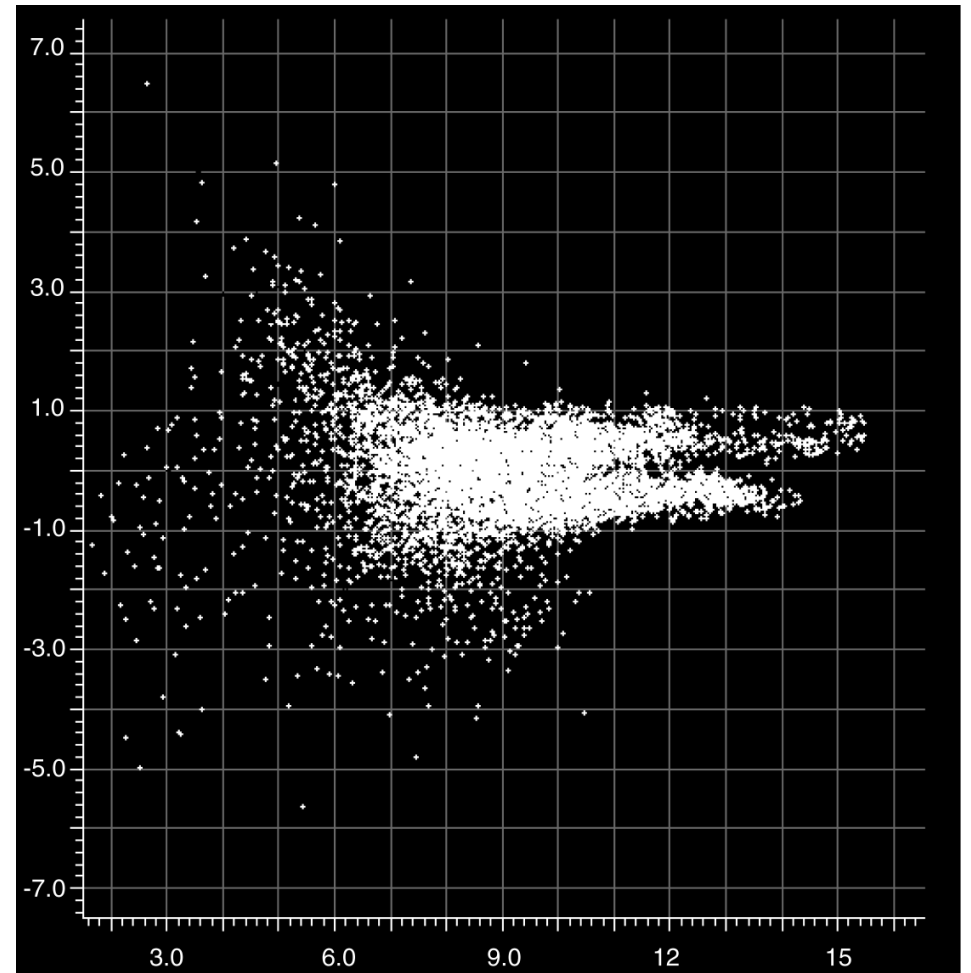

A (intensities)

MA plots continued.

Raw data (40 mg IB  $\Gamma^{-1}$  replicate 3)

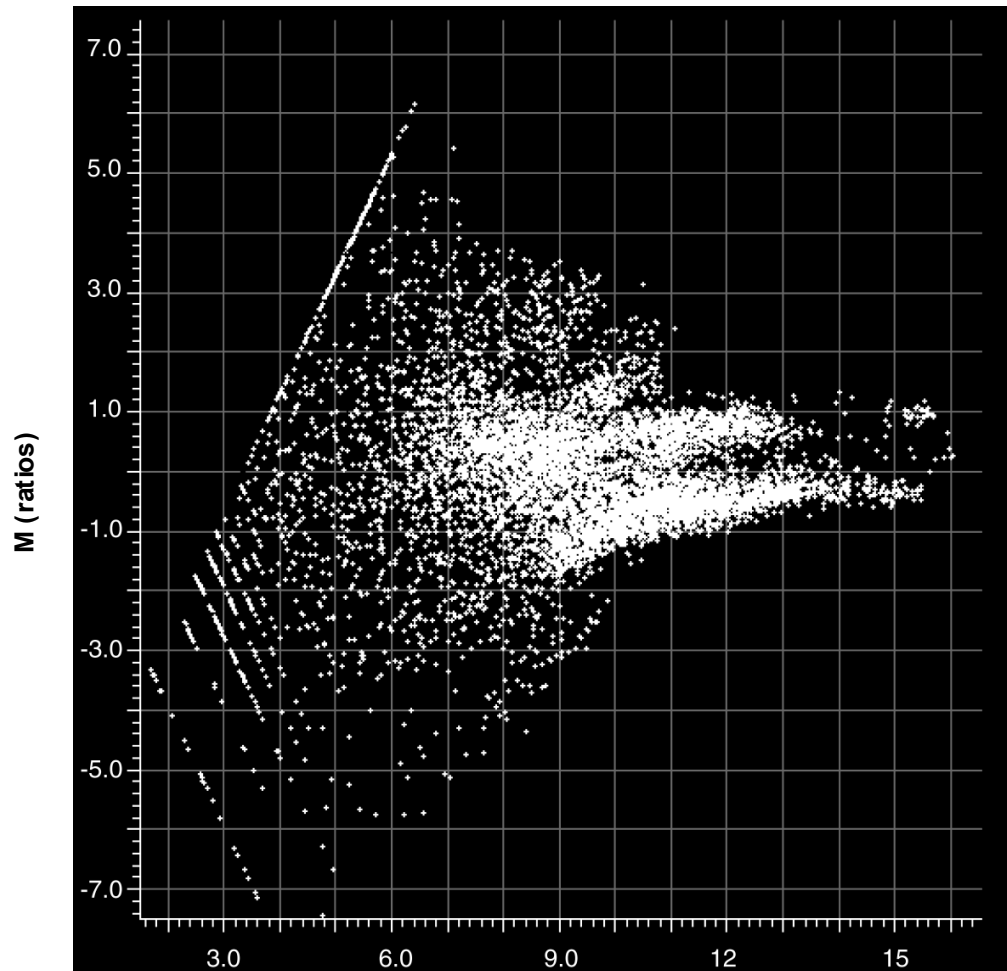

Normalised data (40 mg IB  $\Gamma^{-1}$  replicate 3)

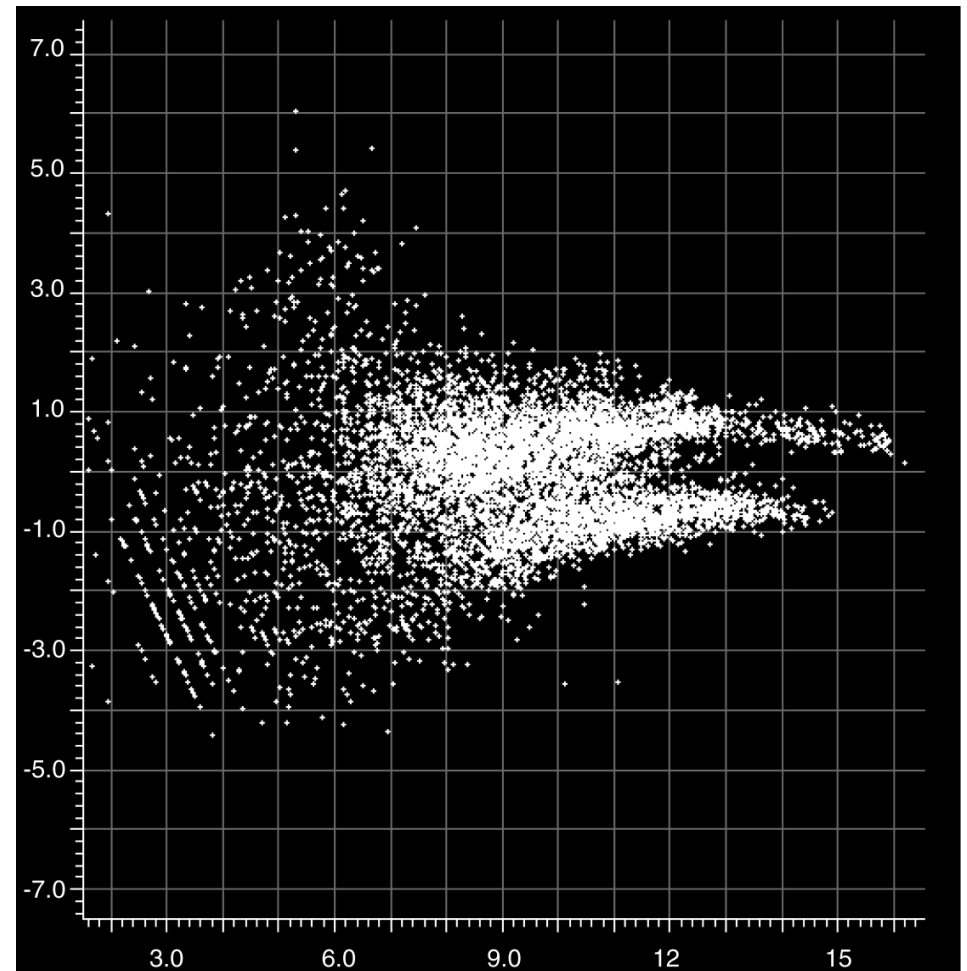

A (intensities)

MA plots continued.

Raw data (80 mg IB  $\Gamma^{-1}$  replicate 3)

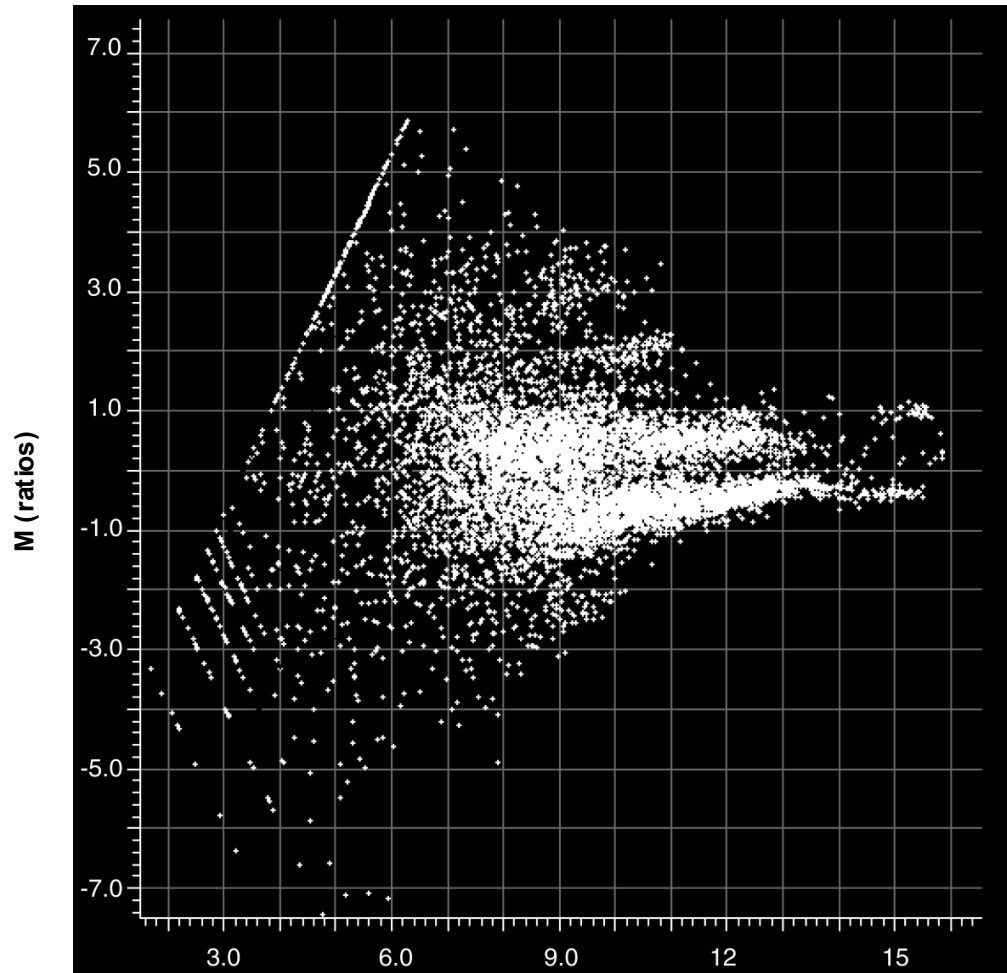

Normalised data (80 mg IB  $\Gamma^{-1}$  replicate 3)

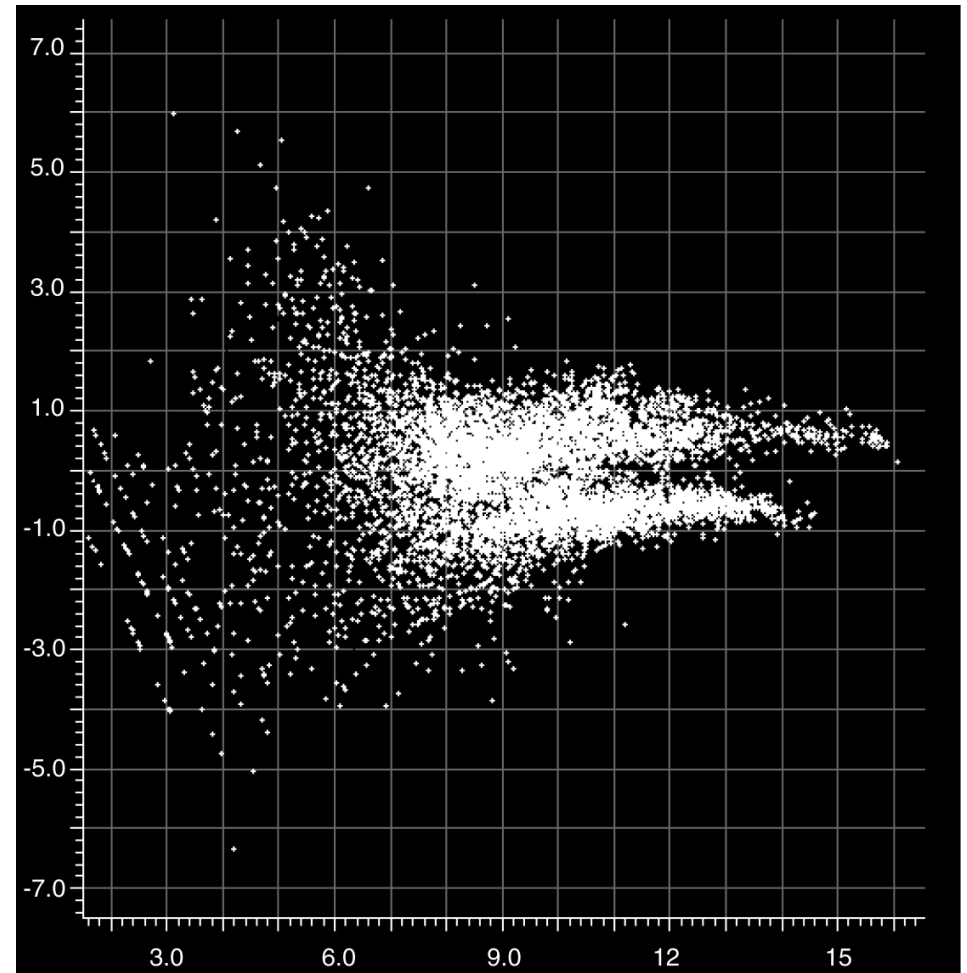

A (intensities)

MA plots continued.

Raw data (0 mg IB l<sup>-1</sup> replicate 4)

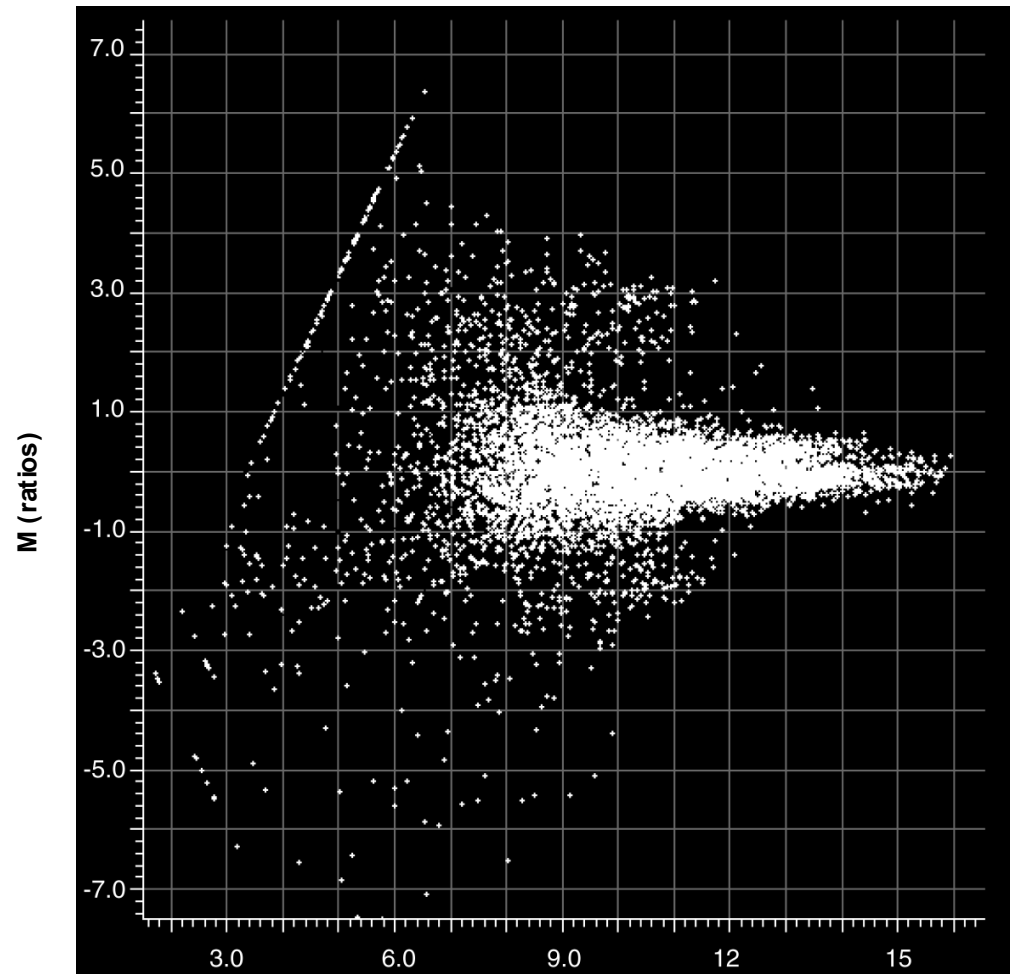

Normalised data (0 mg IB l<sup>-1</sup> replicate 4)

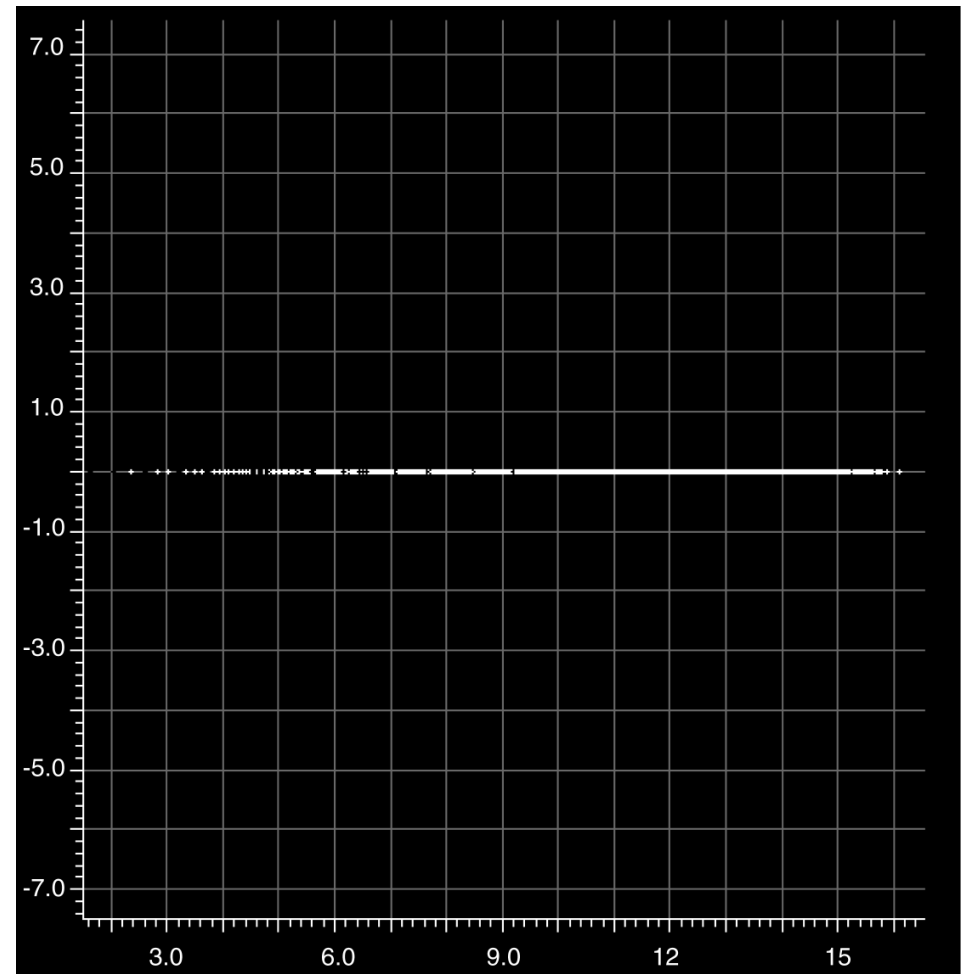

A (intensities)

MA plots continued.

Raw data (20 mg IB  $\Gamma^{-1}$  replicate 4)

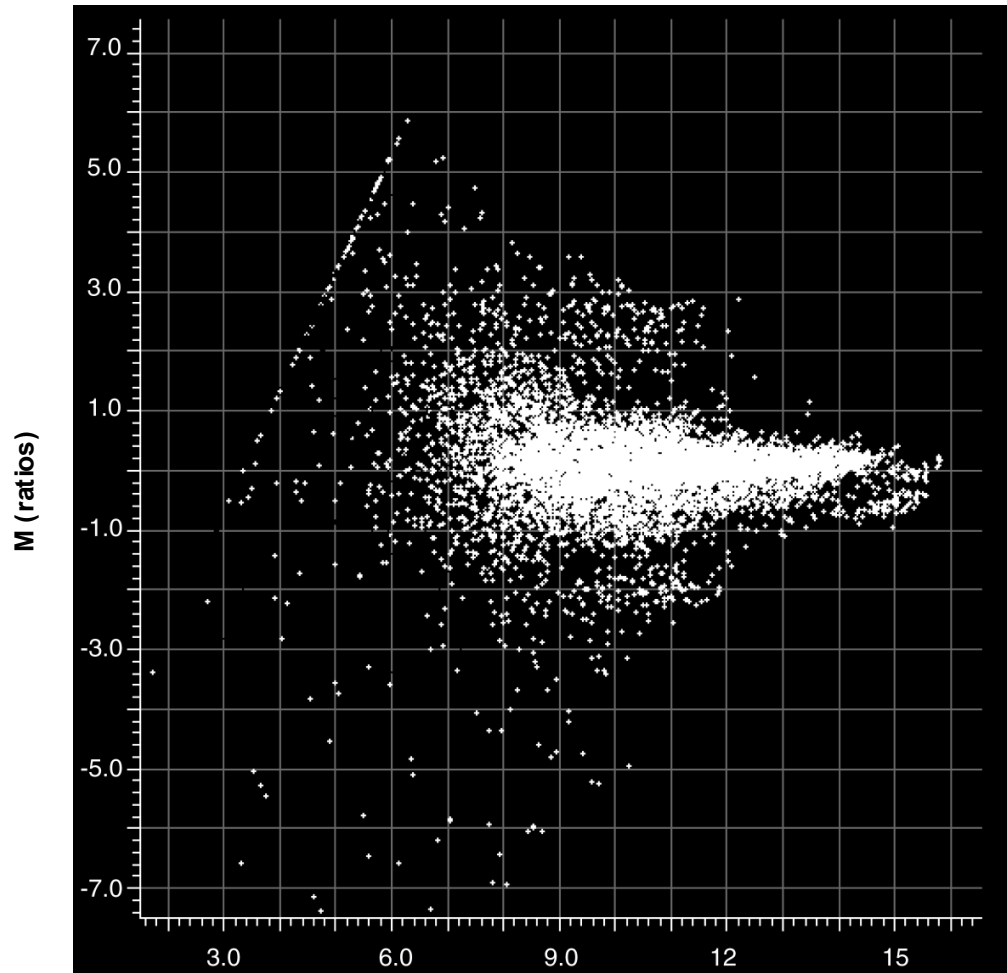

Normalised data (20 mg IB  $\Gamma^{-1}$  replicate 4)

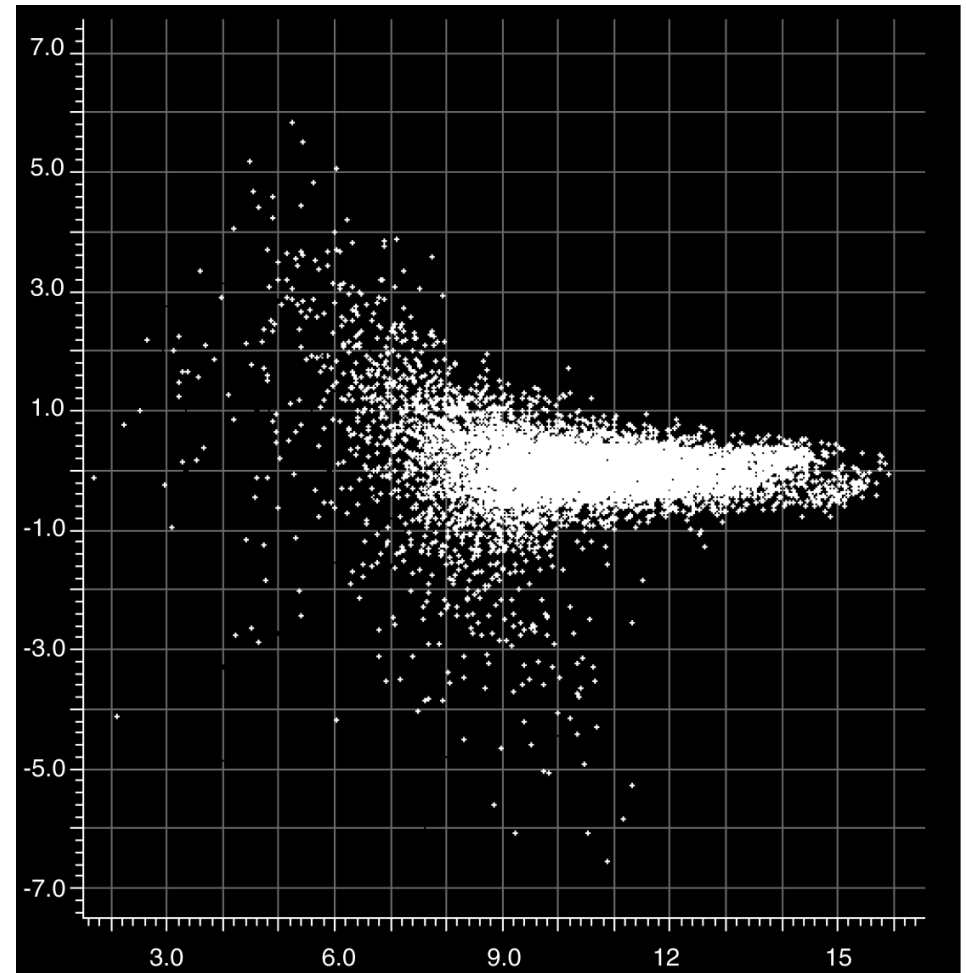

A (intensities)

MA plots continued.

Raw data (40 mg IB  $\Gamma^{-1}$  replicate 4)

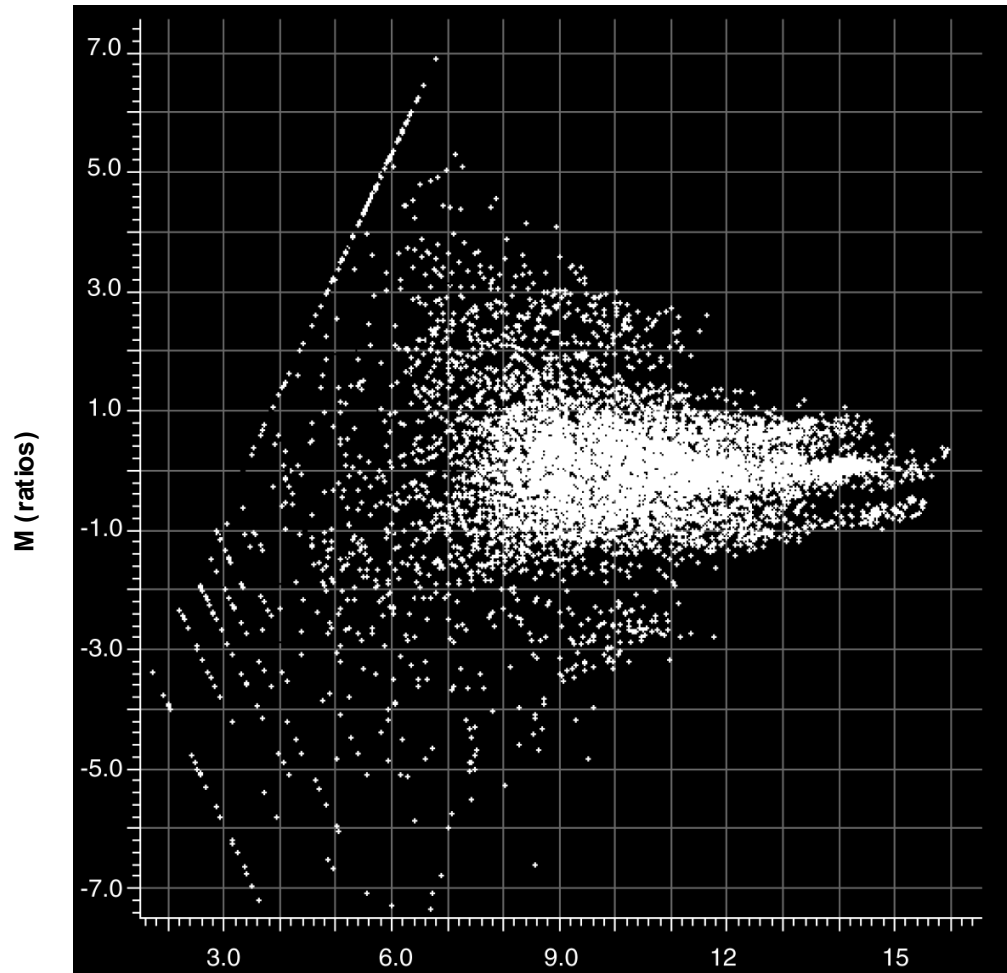

Normalised data (40 mg IB  $\Gamma^{-1}$  replicate 4)

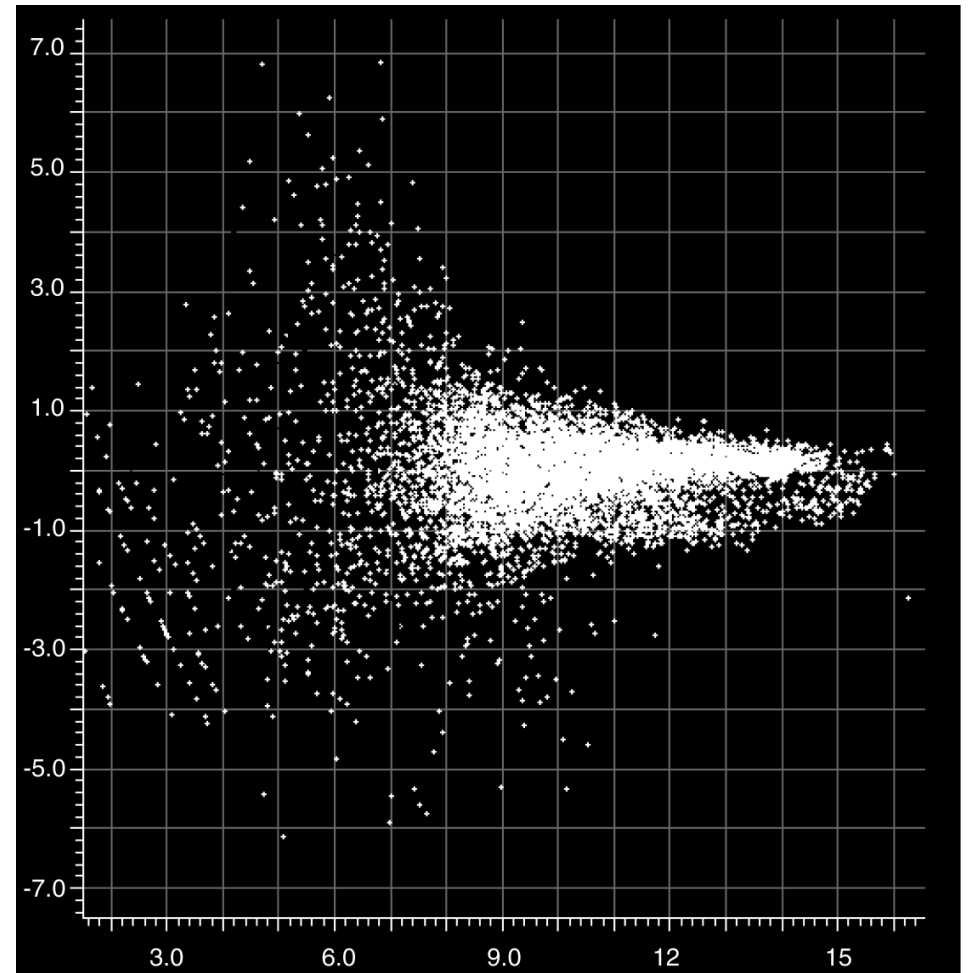

A (intensities)

MA plots continued.

Raw data (80 mg IB  $\Gamma^{-1}$  replicate 4)

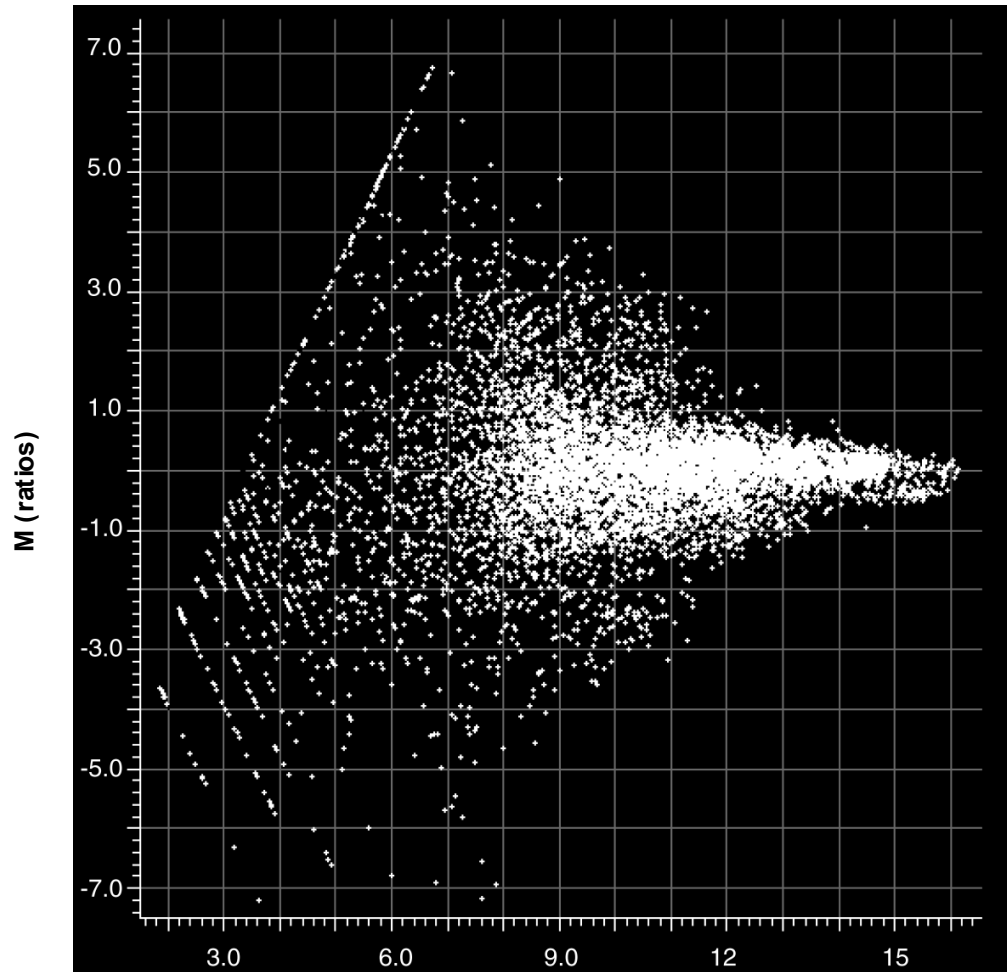

Normalised data (80 mg IB  $\Gamma^{-1}$  replicate 4)

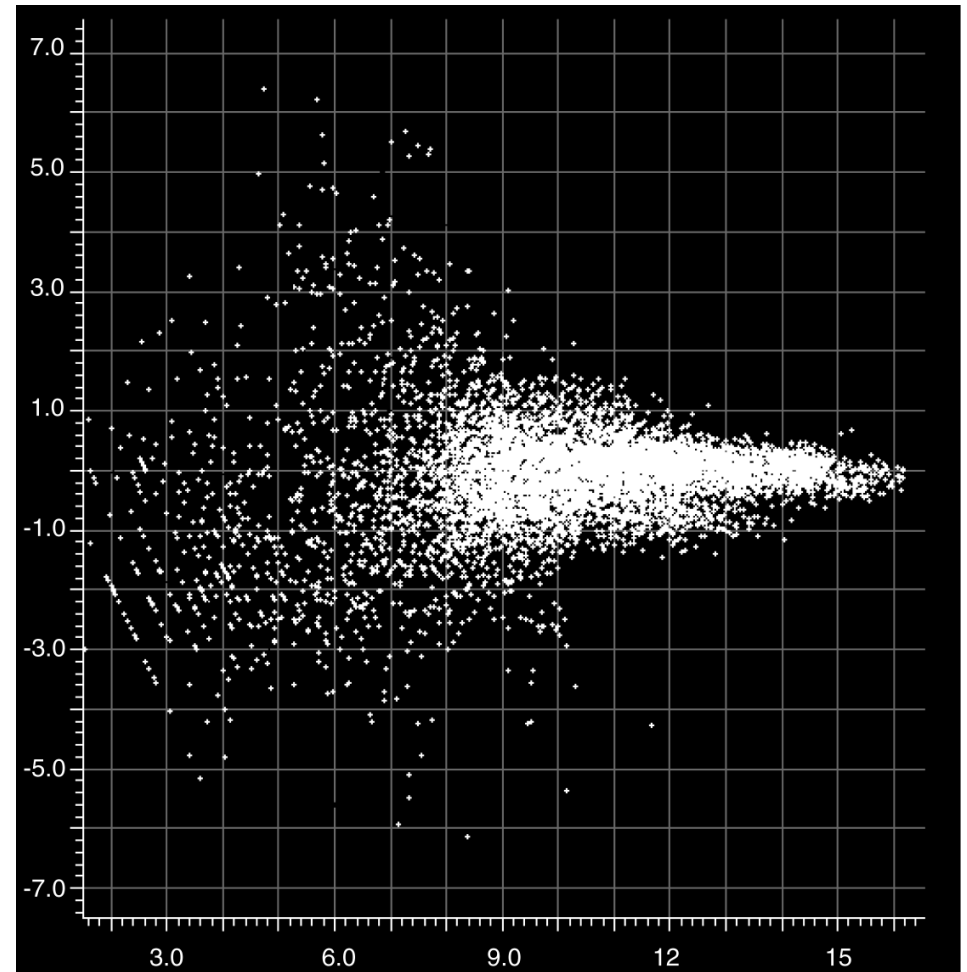

A (intensities)

\*Data were normalised using per spot and per chip intensity-dependent (Global LOWESS) normalisation followed by a per gene normalisation to the control samples, within each hybridisation batch, to normalise for batch variations.
