# Supplementary material for: Systems biology meets stress ecology: linking molecular and organismal stress responses in Daphnia magna
Source: PubMed Central journal article supplement (PMC2374704; doi:10.1186/gb-2008-9-2-r40), 2008-02-21
Supplement: gb-2008-9-2-r40-S7.pdf [file gb-2008-9-2-r40-S7.pdf]

**Additional data file 7. Water chemistry of follow-up studies (mean ± SE).**

|                                                        | Adult exposure<br>(n = 5) |                        | Post-exposure rearing<br>of neonates (n = 1) | Temporal exposure<br>(n = 5)* |
|--------------------------------------------------------|---------------------------|------------------------|----------------------------------------------|-------------------------------|
|                                                        | Day 4                     | Day 8                  | Culture media record                         | 2-48 h                        |
| <b>Conductivity (<math>\mu\text{S cm}^{-1}</math>)</b> |                           |                        |                                              |                               |
| Control                                                | 400±4 <sup>a</sup>        | 409±4 <sup>a</sup>     | 393                                          | 445±7 <sup>a</sup>            |
| 20 mg IB l <sup>-1</sup>                               | 408±4 <sup>a</sup>        | 418±4 <sup>a</sup>     |                                              |                               |
| 40 mg IB l <sup>-1</sup>                               | 415±5 <sup>a</sup>        | 425±5 <sup>a</sup>     |                                              |                               |
| 80 mg IB l <sup>-1</sup>                               | 424±4 <sup>b</sup>        | 432±4 <sup>b</sup>     |                                              | 462±5 <sup>a</sup>            |
| <b>pH</b>                                              |                           |                        |                                              |                               |
| Control                                                | 8.12±0.02 <sup>a</sup>    | 7.79±0.01 <sup>a</sup> | 7.22                                         | 7.66±0.02 <sup>a</sup>        |
| 20 mg IB l <sup>-1</sup>                               | 8.22±0.02 <sup>ab</sup>   | 7.78±0.01 <sup>a</sup> |                                              |                               |
| 40 mg IB l <sup>-1</sup>                               | 8.29±0.04 <sup>bc</sup>   | 7.79±0.02 <sup>a</sup> |                                              |                               |
| 80 mg IB l <sup>-1</sup>                               | 8.43±0.05 <sup>c</sup>    | 7.91±0.02 <sup>b</sup> |                                              | 7.69±0.02 <sup>a</sup>        |

\*Measurements are based on temporal sampling (2, 4, 8, 24 and 48 h) of pooled control or exposed samples. Different letters within the same parameter and column signify a significant difference ( $P < 0.05$ , Student's *t*-test).
