# Supplementary material for: Systems biology meets stress ecology: linking molecular and organismal stress responses in Daphnia magna
Source: PubMed Central journal article supplement (PMC2374704; doi:10.1186/gb-2008-9-2-r40), 2008-02-21
Supplement: gb-2008-9-2-r40-S8.pdf [file gb-2008-9-2-r40-S8.pdf]

**Additional data file 8. Technical data on real-time quantitative PCR.**

| Target gene           | Accession#             | Primers (5'-3') <sup>a</sup>                   | Amplicon size (bp) | Amplification efficiency (E) <sup>b</sup> |
|-----------------------|------------------------|------------------------------------------------|--------------------|-------------------------------------------|
| <i>Lip</i>            | BJ930771               | CTGTTTATTGGCGACATTGC<br>TAGCCGTTTCATTCTCCAACC  | 95                 | 0.920±0.041                               |
| <i>Ltb4dh</i>         | DY242190               | AACCTACACCGAGGGTTTCG<br>TCCAACATTAACGCCATTAAGC | 70                 | 0.926±0.012                               |
| <i>CTP</i>            | EV243383               | AGATTCCATACTCGGCAGGA<br>CTCTGTGCGTTCTGTGGCTA   | 86                 | 0.926±0.020                               |
| <i>COX</i>            | DY037294               | CCACCTCGCAAATTGTCTTT<br>GTCCCACGATGGATTCAACT   | 77                 | 1.037±0.071                               |
| <i>Cht</i>            | Contig961 <sup>c</sup> | CACTCATTGGTCTACGCTTTCG<br>CGGCTGGATTGTTGGGTTT  | 70                 | 0.956±0.056                               |
| <i>DmagVTG1</i>       | AB252737               | CTGGCAAATGGGAAATCAAC<br>CCCAGGTGTAAGCCAAACC    | 93                 | 0.857±0.020                               |
| <i>FABP3</i>          | EV243384               | GGCAAAGTGATGGTCCAAAC<br>TTCACATGCATCTCGTCTCC   | 89                 | 0.850±0.034                               |
| <i>JHE</i>            | BJ932560               | ATGGAGTTCTCAACGGAACG<br>ATCTCAGGTGTGGCATTTC    | 100                | 0.995±0.053                               |
| <i>RXR</i>            | DQ530508               | CCGTTTGAATGAACTCTTG<br>TGGATAACGAGGCCAGTAGC    | 91                 | 1.064±0.076                               |
| <i>VMO1</i>           | EV243385               | TATTACGCGGTTTCAGACGTG<br>GTTGTCCGCCTCACTACCAT  | 87                 | 0.822±0.035                               |
| <b>Reference gene</b> |                        |                                                |                    |                                           |
| <i>Act</i>            | AJ292554               | CCCACTGTCCCCATTTATGAA<br>CGCGACCAGCCAAATCC     | 71                 | 0.999±0.081                               |
| <i>GAPDH</i>          | AJ292555               | GGCAAGCTAGTTGTCAATGG<br>TATTCAGTCCAGCAGTTCC    | 89                 | 0.995±0.054                               |
| <i>UBC</i>            | BJ928996               | TCACCTGCACTACCATTTC<br>AATCTCCGGAACCAAGGAT     | 90                 | 1.088±0.022                               |

<sup>a</sup>Upper and lower sequences represent forward and reverse primers, respectively; <sup>b</sup>Values are mean ± SD (N = 80). Gene name abbreviations as in Fig. 1; <sup>c</sup>Contig sequence for *Cht* is available on DaphniaBase [55].
